# The Amyloid Structure of Mouse RIPK3 (Receptor Interacting Protein Kinase 3) in Cell Necroptosis

Xia-lian Wu<sup>#1,2,3</sup>, Hong Hu<sup>#1,2,3</sup>, Xing-qi Dong<sup>1,2,3</sup>, Jing Zhang<sup>1,2,3</sup>, Jian Wang<sup>1</sup>, Charles D. Schwieters<sup>4</sup>, Jing Liu<sup>1,2,3</sup>, Guo-xiang Wu<sup>1,2,3</sup>, Bing Li<sup>1</sup>, Jing-yu Lin<sup>1,2,3</sup>, Hua-yi Wang<sup>\*1</sup>, Jun-xia Lu<sup>\*1</sup>

<sup>1</sup> School of Life Science and Technology, ShanghaiTech University, Shanghai 201210, P. R. China

<sup>2</sup> Institute of Biochemistry and Cell Biology, Chinese Academy of Sciences, Shanghai 200031, P. R. China

<sup>3</sup> University of Chinese Academy of Sciences, Beijing 100049, P. R. China

<sup>4</sup> Laboratory of Imaging Sciences, Office of Intramural Research, Center for Information Technology, National Institutes of Health, Bethesda, MD 20892, USA

# These authors contributed equally

\*Correspondence:

[wanghuayi@shanghaitech.edu.cn](mailto:wanghuayi@shanghaitech.edu.cn),

[lujx@shanghaitech.edu.cn](mailto:lujx@shanghaitech.edu.cn)

## ABSTRACT

RIPK3 amyloid complex plays crucial roles in execution of TNF-induced necroptosis and in response to immune defense in both human and mouse. We have structurally characterized the mouse RIPK3 homogeneous self-assembly using solid-state NMR, illustrating a well-ordered N-shaped amyloid core structure featured with 3 parallel in-register  $\beta$ -sheets. The structure is different from previously published human RIPK1/RIPK3 hetero-amyloid complex. Functional studies indicate both RIPK1-RIPK3 binding and RIPK3 amyloid formation are essential but not sufficient for RIPK3-mediated necroptosis. The structural integrity of RIPK3 fibril with three  $\beta$ -strands is necessary for the signaling. Molecular dynamics simulation of the mouse RIPK1/RIPK3 model indicates less stable for the hetero-amyloid to adopt RIPK3 fibril conformation, suggesting a structural transformation of RIPK3 from RIPK1-RIPK3 binding to RIPK3 amyloid formation. This structural transformation is revealed for the first time, providing a missing link connecting RIPK1-RIPK3 binding to RIPK3 homo-oligomer formation in the signal transduction.

## INTRODUCTION

Amyloids, commonly associated with the neurodegenerative disease, have been found playing extraordinary roles in various biological systems, functioning beyond neurodegeneration<sup>1</sup>. In necroptosis, a group of signaling complexes, termed signalosomes<sup>2</sup>, have been characterized having structural properties as amyloids<sup>3</sup>. RIPK3 is the major component in these signalosomes and an indispensable player in necroptosis<sup>4</sup>. RIPK3 consists of a N-terminal kinase domain and a C-terminal receptor homotypic interaction motif (RHIM) (Figure 1A). RHIM contains the most conserved tetrad sequence I (V) QI (V) G, plus the hydrophobic sequences flanked on both sides of the tetrad (Figure S1A). In

42 RIPK3-mediated necroptosis, RIPK3 assembles into amyloids to provide a scaffold for its N-terminal  
43 kinase domain to self-phosphorylate or phosphorylate the downstream effector molecule mixed lineage  
44 kinase domain-like protein (MLKL)<sup>3,5</sup>. It is RHIM and the nearby sequence that initiate the oligomerization  
45 and result into the formation of RIPK3 assembly. The kinase domain self-phosphorylates and  
46 phosphorylates MLKL only when RIPK3 oligomerizes<sup>6</sup>. Upon phosphorylation, MLKL would adopt  
47 significant structural transformation and further oligomerize, with its positively charged N-terminal coil-coil  
48 region targeting the negatively charged phospholipids in the cellular membrane to form a pore, disrupting  
49 the plasma membrane<sup>7,8</sup>.

50 Many proteins<sup>9-11</sup> in necroptosis pathway contain RHIMs (Figure S1A), and the intermolecular  
51 RHIM-RHIM interactions are mainly responsible for the intermolecular interactions and the assembly  
52 formation in the different signalosome. We are still lacking detailed structural information on these different  
53 high-order complexes. A hetero-amyloid structure of human RIPK1/RIPK3, related to the signalosome  
54 formed in tumor necrotic factor (TNF)-induced necroptosis pathway, has been solved recently by  
55 solid-state NMR (SSNMR) (pdb:5V7Z Figure S1B)<sup>12</sup>. It has been proposed that the hetero-amyloid  
56 formed upstream of RIPK3 amyloid could serve as a template to recruit free RIPK3 into the same  
57 structure, thereby transducing and amplifying necrotic signals from RIPK1 to RIPK3<sup>3</sup>. However, the  
58 RIPK1/RIPK3 hetero complex cannot induce RIPK3 kinase activation directly<sup>13</sup>, the RIPK3 self-assembly  
59 is necessary to induce cell necroptosis either downstream of RIPK1-RIPK3 binding or independently  
60 without RIPK1. It would be interesting to see the structural details of the pure RIPK3 amyloid and whether  
61 it can adopt structures similar to those of RIPK1/RIPK3 complexes.

62 We characterized the amyloid structure of mouse RIPK3 using SSNMR for the first time. We identified  
63 RIPK3 RHIM region consisting of three  $\beta$ -strands, with the conserved VQIG sequence contributing to the  
64 center  $\beta$ -strand. The three  $\beta$ -strands are arranged as an “N” shape with the last  $\beta$ -strand as a part of a  
65 long tail. There is only one protein molecule in each cross- $\beta$  unit of mouse RIPK3 fibril, interacting with  
66 neighboring molecules in a parallel in-register fashion. This conformation is different from the  
67 hetero-amyloid structure of human RIPK1/RIPK3, although both structures show the RHIM conserved  
68 tetra sequence as the center segment for the amyloid  $\beta$ -sheet structure. The hetero-amyloid contains two  
69 molecules in a single cross- $\beta$  unit, with the amyloid core structure stabilized by the intermolecular  
70 interactions between the hydrophobic residue side-chains mainly from the tetrad sequence of 2  
71 molecules. However, in the mouse RIPK3 amyloid, the first two  $\beta$ -strands form the “ $\beta$ -arches” structure.  
72 The amyloid core structure is stabilized by the intramolecular interactions between the hydrophobic  
73 residue side-chains from the different  $\beta$ -strands within the same protein molecule. Segmental (4-alanine)  
74 replacement of mouse RIPK3 on the first two  $\beta$ -strands individually would totally block the interaction  
75 between RIPK1 and RIPK3, and inhibit mouse NIH-3T3 cell necroptosis. On the other hand, single-site  
76 mutations at each of the three  $\beta$ -strands (F442D, Q449D or L456D) of mouse RIPK3 inhibit mouse  
77 NIH-3T3 cell necroptosis while RIPK1 and RIPK3 interactions are still maintained. And these RIPK3  
78 mutants still form the fibril in solution. Combining these results, we could propose that both RIPK1-RIPK3  
79 binding and the RIPK3 amyloid formation are essential, but not sufficient for RIPK3 mediated necroptosis.  
80 The structural integrity of RIPK3 RHIM which consists three  $\beta$ -strands is necessary for RIPK3 function. To  
81 further explore the interaction mechanism between mouse RIPK1 and RIPK3, a molecular dynamics (MD)  
82 simulation was carried out on a hetero-amyloid model using mouse RIPK3 fibril structure as the template  
83 but replacing half of the molecules to mouse RIPK1 sequence. The results indicate that lower stability for  
84 a hetero-amyloid to adopt the conformation as mouse RIPK3 homo-amyloid, and the hetero-amyloid  
85 exhibits an opening of the “ $\beta$ -arches” formed by the first two  $\beta$ -strands, showing a structure with great

86 similarities to the human RIPK1/RIPK3 hetero-amyloid. These findings suggest mouse RIPK3 would  
87 undergo a structural transformation from the hetero-oligomer formed upon RIPK1-RIPK3 interaction to the  
88 RIPK3 self-assembly. Amyloids are used to be considered as irreversible structural assemblies with high  
89 stability. For the first time, our results provide a picture of an amyloid structural transformation in the  
90 necroptosis signal transduction pathway from RIPK1-RIPK3 binding to RIPK3 self-assembly, explaining  
91 why RIPK1/RIPK3 hetero complex could not induce RIPK3 kinase activation directly.

92

## 93 RESULTS

### 94 Fibril Formation by Mouse RIPK3

95 The full-length mouse RIPK3 contains a kinase domain connecting a RHIM motif through a random coil  
96 linker as shown in Figure 1A. The most conservative sequence <sup>448</sup>VQIG<sup>451</sup> for RHIM contributes to RIPK3  
97 fibril architecture directly<sup>3</sup>. Online prediction on RIPK3 amylogenic regions using Waltz  
98 (<http://waltz.switchlab.org>)<sup>14</sup> showed a small segment (<sup>449</sup>QIGNYNSLV<sup>457</sup>) in the C-terminal domain would  
99 tend to form aggregation. However, PSIPRED ([bioinf.cs.ucl.ac.uk/psipred/](http://bioinf.cs.ucl.ac.uk/psipred/))<sup>15,16</sup> predicted the secondary  
100 structure of mouse RIPK3 C-terminal domain containing 3 sequential segments <sup>440</sup>LVFN<sup>443</sup>, <sup>447</sup>EVQI<sup>450</sup>,  
101 and <sup>455</sup>SLV<sup>457</sup> that could form  $\beta$ -strand and may contribute to fibril formation (FigureS2A, Figure 3A).  
102 Finally, a sequence from mouse RIPK3 residue 409 to the end, a 78-residue sequence covering the  
103 predicted  $\beta$ -strand region, was constructed (Figure 1B) with a 6×His tag attached at the N-terminus.  
104 Protein was expressed in *E. coli* system and purified according to the method described below.

105 We prepared the fibrils by dialysis the denatured protein in H<sub>2</sub>O at room temperature. Negatively stained  
106 fibrils are relatively straight, unbranched and single-stranded showed by transmission electron microscopy  
107 (TEM) (Figure 1C). The X-ray diffraction image of fibril in Figure 1D indicates a typical feature of cross- $\beta$   
108 amyloid structure with equatorial and meridional diffraction at about 9.7 Å and 4.7 Å, respectively. Atomic  
109 force microscope (AFM) images (Figure 1E and F) reveal uniform fibril heights of 1.8±0.2 nm for mouse  
110 RIPK3. Measuring mass-per-length (MPL) value of fibrils is usually an effective means of characterizing  
111 the quantity of monomer in the cross- $\beta$  unit of a fibril. We used dark-field Beam Tilted (BT)-TEM to obtain  
112 MPL value for the fibril<sup>17</sup>. A typical image shown in Figure 1G contains a mixture of mouse RIPK3 fibrils  
113 and tobacco mosaic virus (TMV) where TMV serves as an internal standard with an MPL value of 131  
114 kDa/nm. The MPL values of mouse RIPK3 fibrils were summarized into a histogram, fit with a Gaussian  
115 distribution in Figure 1H. In our results, we observed a center value about 17.2 ±0.2 kDa/nm. When one  
116 mouse RIPK3 monomer with molecular weight 9.57kDa lies in a single cross- $\beta$  unit with a spacing  
117 between cross- $\beta$  units about 4.7-4.8 Å, the expected MPL value is about 19.9-20.3 kDa/nm as indicated in  
118 vertical red line in Figure 1H. The result indicates mouse RIPK3 fibril is one-fold symmetry structure  
119 across the fibril axis. The width of the Gaussian distribution (full-width-at-the-half-maximum) is 13.2  
120 kDa/nm, caused by the background intensity variations in the images. The background intensity variations  
121 are also displayed in Figure S3.

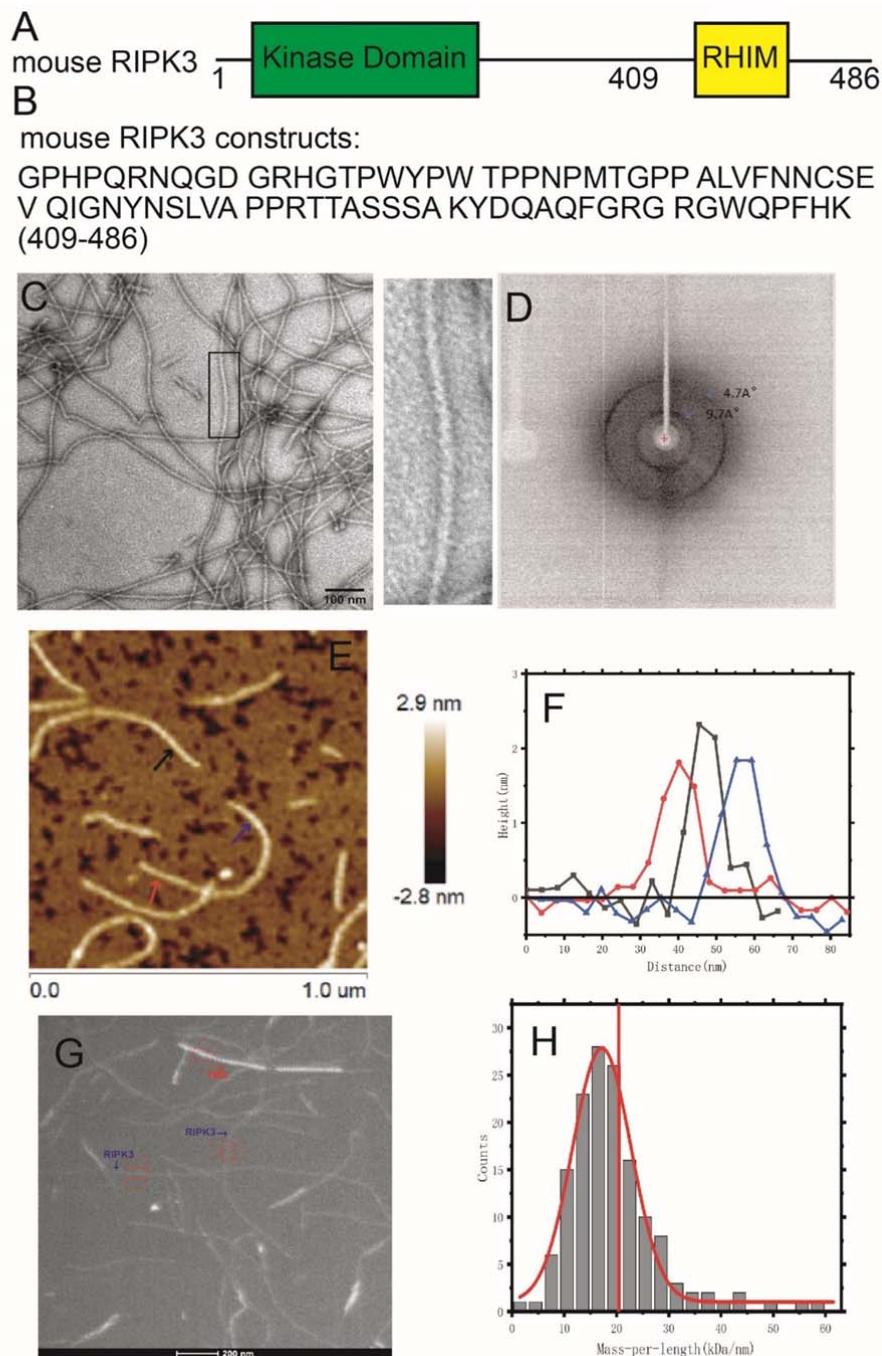

122

123 **Figure 1. The EM, X-ray diffraction and AFM images of mouse RIPK3 fibrils.** (A) The domain components of the full-length mouse  
124 RIPK3. (B) Protein sequence of mouse RIPK3 construct used for structural elucidation. (C) Electron micrograph of amyloid fibrils (scale  
125 bar 100 nm). Mouse RIPK3 fibrils have the straight, unbranched appearance of typical amyloid fibrils. The picture on the right is an  
126 expanded view of the boxed area on the left image. (D) The X-ray diffraction of mouse RIPK3 fibrils. The blue arrow indicated equatorial  
127 and meridional reflection at about 9.7Å and 4.7Å resolutions, respectively. (E) The AFM image of mouse RIPK3 fibrils on mica surface.  
128 (F) The height profile at 3 positions of mouse RIPK3 fibrils corresponding to the three positions indicated by the arrows in E, showing  
129 fibril diameter about 1.8-2.0 nm. (G) One BT-TEM image of mouse RIPK3 fibrils, with tobacco mosaic virus (TMV) particles as

130 standards for MPL measurement. (H) MPL histogram of mouse RIPK3 fibrils derived from BT-TEM images. Vertical red line  
131 indicated MPL values of 20.3kDa/nm, the expected value if a single molecule lies in the cross- $\beta$  unit of the fibril. The  
132 variations in the background intensity is analyzed in figure S2.

133

### 134 Identification of the Amyloid Fibril Core Region

135 In order to identify the amyloid fibril core region, SSNMR experiments on the uniformly labeled mouse  
136 RIPK3 fibrils were conducted. Cross-polarization based SSNMR experiments would reveal the  
137 immobilized structure contributed mostly from the fibrils<sup>3,12,18</sup>. Figure 2 shows 2D  $^{13}\text{C}$ - $^{13}\text{C}$  DARR,  $^{13}\text{C}$ - $^{15}\text{N}$   
138 NcaCX and  $^{13}\text{C}$ - $^{15}\text{N}$  NcoCX spectra with 50ms mixing time. There are less peaks than expected for a  
139 78-residue peptide, indicating only part of the sequence is involved in the fibril formation. J coupling based  
140  $^1\text{H}$ - $^{13}\text{C}$  INEPT and TOBSY experiments were also carried out, showing many peaks from the peptide  
141 mobile component (Figure S4).

142 The SSNMR 2D spectra in figure 2 have good resolutions, showing a single morphology for the fibrils and  
143 allowing us to do the sequential assignment. 3D  $^{13}\text{C}$ - $^{15}\text{N}$  NCACX and 3D  $^{13}\text{C}$ - $^{15}\text{N}$  NCOCX spectra were  
144 also collected to facilitate the assignment. We confirmed that the rigid segment that was able to be  
145 sequential assigned was from residue 441 to 461, while most residues at the flanking region had no  
146 SSNMR signals. The chemical shifts were summarized in Table S1. Figure 3B showed the secondary  
147 chemical shift ( $\Delta\delta\text{C}\alpha$ - $\Delta\delta\text{C}\beta$ ) plot where the measured chemical shift values of residue  $\text{C}\alpha$  and  $\text{C}\beta$  were  
148 compared to the theoretical values for a random coil structure. A negative value of  $\Delta\delta\text{C}\alpha$ - $\Delta\delta\text{C}\beta$  suggests  
149  $\beta$ -sheet secondary structure. Three segments from residue V441 to N444, residue V448 to N452 and  
150 residue N454 to P460 showed negative values, indicating three  $\beta$ -strands. Using the TALOS-N server<sup>19</sup>,  
151 the protein torsion angles  $\psi$  and  $\phi$  were also predicted, confirming  $\beta$ -sheet secondary structure of the fibril  
152 (Figure 3C). Therefore, mouse RIPK3 fibril is composed of three  $\beta$ -strands with the most conserved RHIM  
153 tetrad sequence as the center  $\beta$ -strand, generally consistent with the prediction from the online software  
154 PSIPRED (Figure 3A).

155

### 156 Fibril Structural Model for Mouse RIPK3

157 The final structures of mouse RIPK3 were calculated using the Xplor-NIH program, with experimental  
158 distance and dihedral restraints. In particular, the inter-residue interactions were obtained using 2D  
159  $^{13}\text{C}$ - $^{13}\text{C}$  correlation spectra with various mixing time from 25 ms to 500ms (Figure 4A, B, D) and  $^{15}\text{N}$ - $^{13}\text{C}$   
160 z-filtered TEDOR spectrum (Figure 4C). Sparsely labeled proteins using [1, 3- $^{13}\text{C}$ ]- and [2- $^{13}\text{C}$ ]-labeled  
161 glycerol as carbon source were used to simplify the assignment. The inter-residue correlations between  
162 the side-chains of L456 and Q449 (Figure 4A, 4C), F442 and I450 (Figure 4B), G451 and N454 (Figure  
163 4C), as well as V441 and G451 (Figure 4D) are shown in SSNMR spectra in figure 4 as some examples. A  
164 total of 10 unambiguous non-sequential inter-residue correlations V441C $\gamma$ -G451C $\alpha$ , S446C $\beta$ -V448C $\beta$ ,  
165 Q449C $\delta$ -L456C $\beta$ , Q449C $\delta$ -L456C $\gamma$ , I450C $\gamma$ -N452C $\alpha$ , G451C $\alpha$ -N454N $\delta$ 2, N452C $\alpha$ -N454C $\alpha$ ,  
166 N452C $\beta$ -N454C $\alpha$ , Y453C $\beta$ -S455C $\beta$ , L456C $\gamma$ -Q449N $\epsilon$ 2 were obtained. From MPL measurements, we  
167 concluded that there was a single protein molecule in a cross- $\beta$  unit of the fibril. Therefore, the  
168 inter-residue contacts obtained from SSNMR correlation spectra were all assumed to be intramolecular  
169 interactions.

170

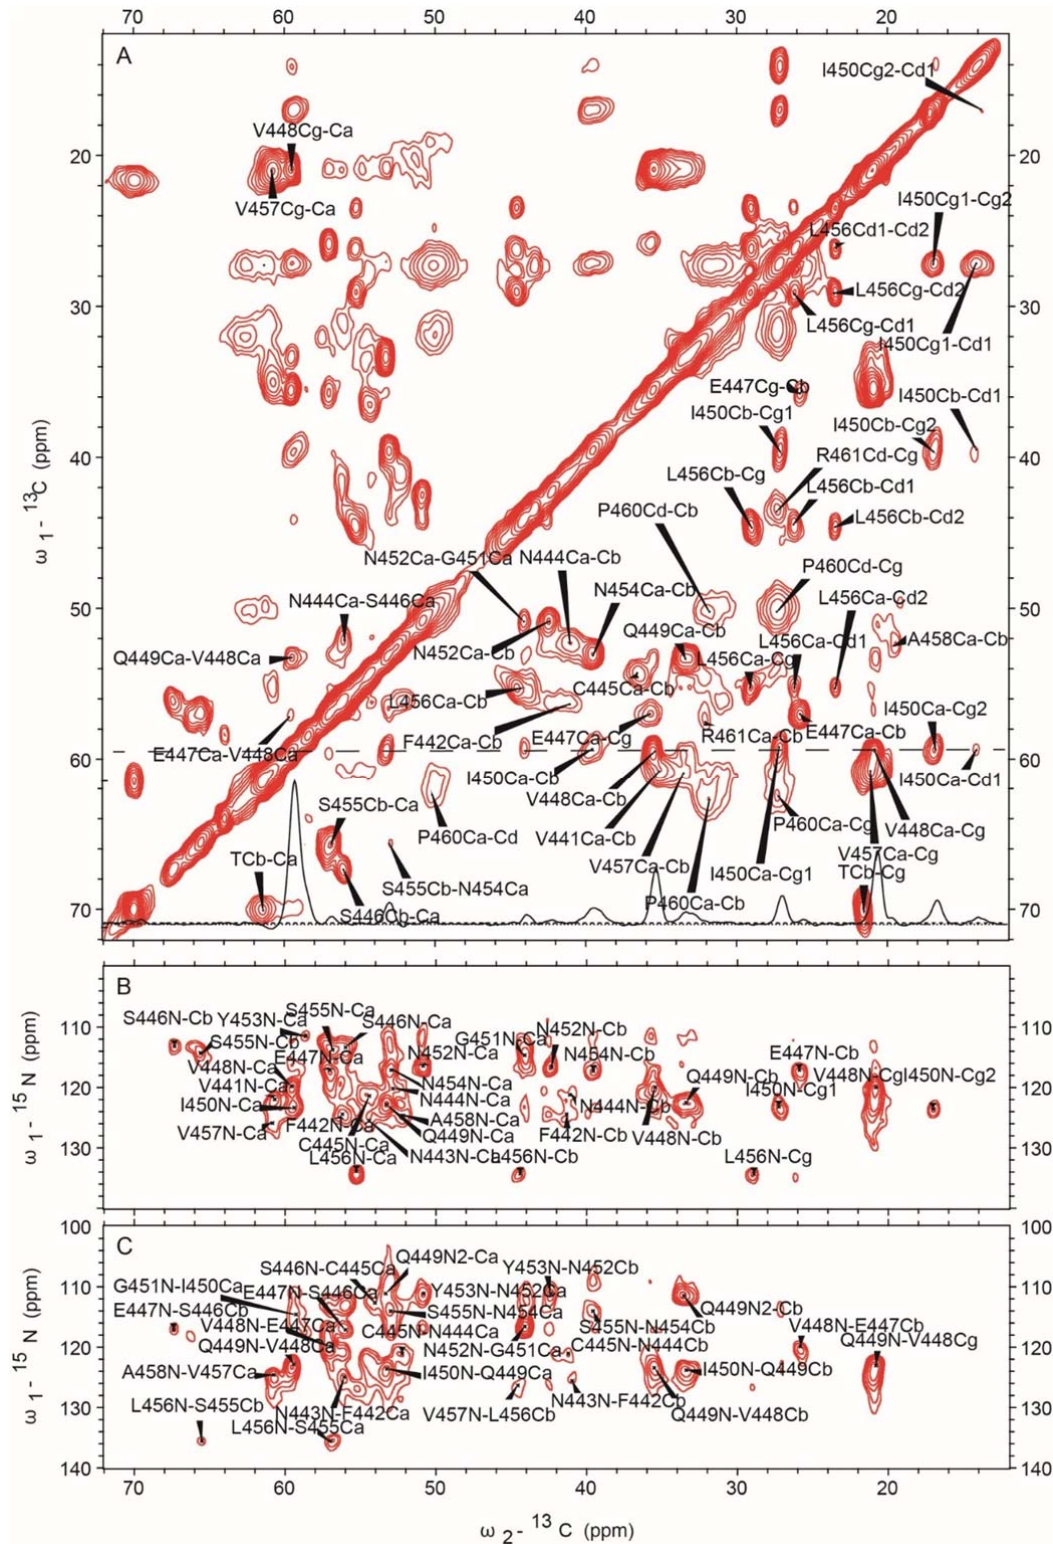

171

172

Figure 2. SSNMR spectra of uniformly labeled mouse RIPK3 fibrils. 2D  ${}^{13}\text{C}$ - ${}^{13}\text{C}$  (up panel), 2D  ${}^{13}\text{C}$ - ${}^{15}\text{N}$  NcaCX (middle panel) and

173

2D  ${}^{13}\text{C}$ - ${}^{15}\text{N}$  NcoCX (bottom panel) with 50 ms DARR mixing. The experiments were carried on a Bruker 700MHz MAS NMR

174

spectrometer with  $\omega_r=15\text{kHz}$ ,  $T=303\text{K}$  and 83.33 kHz  ${}^1\text{H}$  decoupling field applied during acquisition.

175

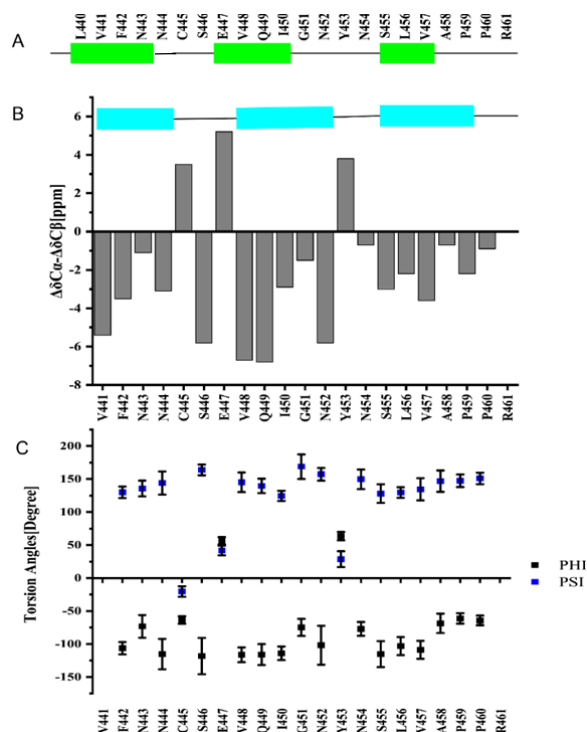

176

177 **Figure 3. Secondary structure prediction from the assigned chemical shifts.**

178 (A) Secondary structure prediction of mouse RIPK3 construct with PSIPRED<sup>15</sup>. (B) Plot of the difference in the secondary chemical  
 179 shift between Cα and Cβ, a negative value indicative of β-sheet secondary structures. (C) Predicted protein dihedral angles φ and ψ  
 180 using TALOS-N based on SSNMR chemical shifts.

181

182 The information on the intermolecular arrangement of β-strands was obtained using 2D <sup>13</sup>C-<sup>13</sup>C spectra on  
 183 the sample with [2-<sup>13</sup>C]-glycerol labelling (Figure S5). With 50 ms mixing, only I450 and V residues show  
 184 strong Cα-Cβ cross-peaks (Figure S5A), because Cα and Cβ atoms of those residues were  
 185 simultaneously <sup>13</sup>C-labeled (<sup>13</sup>Cα-<sup>13</sup>Cβ) in each molecule. Other types of residues would have alternating  
 186 <sup>13</sup>Cα-<sup>12</sup>Cβ or <sup>12</sup>Cα-<sup>13</sup>Cβ labeling patterns because of the properties of [2-<sup>13</sup>C]-glycerol labelling, and thus  
 187 exhibit no Cα-Cβ cross-peaks in <sup>13</sup>C-<sup>13</sup>C spectra with short mixing times. An intermolecular residue  
 188 <sup>13</sup>Cα-<sup>13</sup>Cβ cross-peak would show up with a longer mixing time if the fibril has in-register parallel β-sheet  
 189 conformation. We find that with 500 ms mixing (Figure S5B), E447<sup>13</sup>Cα-<sup>13</sup>Cβ, Q449<sup>13</sup>Cα-<sup>13</sup>Cβ,  
 190 N452<sup>13</sup>Cα-<sup>13</sup>Cβ, N454<sup>13</sup>Cα-<sup>13</sup>Cβ cross-peaks show up clearly, indicating in-register parallel intermolecular  
 191 interactions. Several sequential peaks from residues E447 to V457 are also labeled in figure S5B, such as  
 192 V448Cα-E447Cβ, Q449Cα-V448Cβ, I450Cα-G451Cα, Y453Cα-N452Cβ etc. An <sup>15</sup>N-<sup>13</sup>C z-filtered  
 193 TEDOR experiment on a fibril sample with half of the molecules <sup>15</sup>N labeled and the other half <sup>13</sup>C labeled  
 194 gives the same conclusion (Figure S5C). By comparing the spectrum to NcaCX spectrum of the uniformly  
 195 [<sup>15</sup>N, <sup>13</sup>C]-labeled sample, we found the two spectra are well aligned. Most of the residues N-Cα peaks  
 196 and other peaks, such as V448N-Cβ, Q449N-Cβ, and N452N-Cβ, show up at the same positions for both  
 197 <sup>15</sup>N-<sup>13</sup>C correlation spectra. The z-filtered TEDOR spectrum on the mixed sample using two different  
 198 labels has a lower resolution because it was carried out at a frozen temperature (252K) for an improved  
 199 signal/noise ratio. For the same reason, the z-filtered TEDOR spectrum also exhibits more peaks at some  
 200 positions (<sup>15</sup>N 130-140 ppm, <sup>13</sup>C < 20 ppm). The distance between two subunits in the parallel β-sheet  
 201 conformation is 4.75 ± 0.1 Å, estimated from X-ray diffraction of the fibrils.

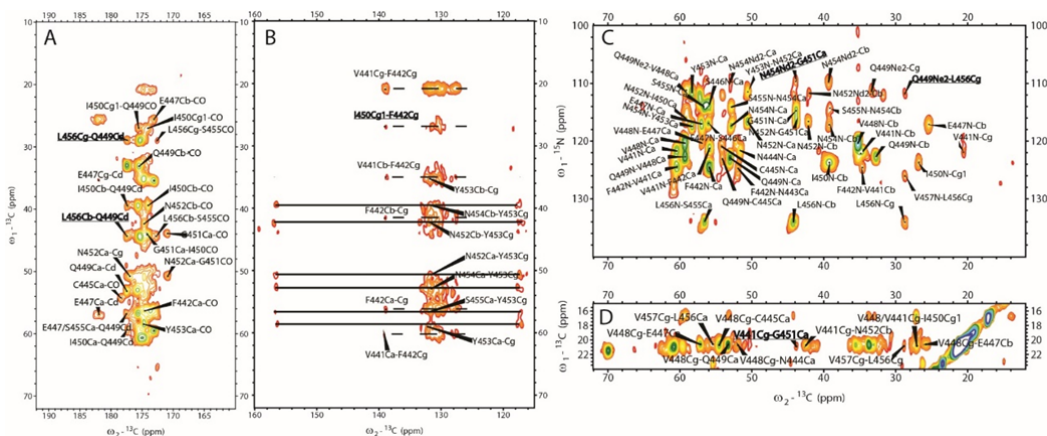

202

203

204 **Figure 4.** SSNMR spectra of uniformly and sparsely  $^{13}\text{C}$ -labeled mouse RIPK3 fibrils highlighting some long-range  
 205 **inter-residue correlation peaks.** (A) 2D  $^{13}\text{C}$ - $^{13}\text{C}$  correlation spectrum of sparsely  $^{13}\text{C}$ -labeled mouse RIPK3 fibrils using  $[2\text{-}^{13}\text{C}]$ -labeled  
 206 glycerol with 200 ms DARR mixing, showing the carbonyl region. The long-range correlation peak L456C $\beta$ /C $\gamma$ -Q449C $\delta$  are highlighted.  
 207 (B) 2D  $^{13}\text{C}$ - $^{13}\text{C}$  correlation spectrum of uniformly  $^{13}\text{C}$ -labeled mouse RIPK3 fibrils with 500 ms DARR mixing, showing the aromatic  
 208 region. The dashed lines indicate the correlation peaks of F442, and the solid lines indicate the correlation peaks of Y453. (C)  $^{13}\text{C}$ - $^{15}\text{N}$   
 209 TEDOR correlation spectrum of sparsely  $^{13}\text{C}$ -labeled mouse RIPK3 fibrils using  $[2\text{-}^{13}\text{C}]$ -labeled glycerol with 6.4 ms z-filtered TEDOR  
 210 recoupling time. The protein is also uniformly  $^{15}\text{N}$ -labeled. TEDOR shows the correlation peaks of N454N $\delta$ 2-G451C $\alpha$  and  
 211 Q449N $\epsilon$ 2-L456C $\gamma$ . (D) 2D  $^{13}\text{C}$ - $^{13}\text{C}$  correlation spectrum of sparsely  $^{13}\text{C}$ -labeled mouse RIPK3 fibrils using  $[1,3\text{-}^{13}\text{C}]$ -labeled glycerol with  
 212 500 ms DARR mixing. The assignment of V441C $\gamma$ -G451C $\alpha$  is unambiguous.

213

214 The backbone torsion angles  $\psi$  and  $\phi$  and 5 side-chain torsion angles  $\chi$  (I450, Y453, N454, L456, V457)  
 215 given by TALOS-N predictions from chemical shift values were also used as structural restraints.  
 216 Xplor-NIH calculations were performed on a fibril represented by 5 copies of residues from 441 to 460.  
 217 Restraints and the structure statistics are listed in Table S2 and S3. The final structure (Figure 5) was  
 218 deposited in the Protein Data Bank with PDB ID 6JPD and BMRB entry assigned accession  
 219 number:36243.

220 The calculated mouse RIPK3 fibril structure exhibits three  $\beta$ -strands folding in an “N” shape with the  
 221 C-terminal  $\beta$ -strand taking the form of a long and extended tail (Figure 5A,C). The first and second  
 222  $\beta$ -strands adopt the “ $\beta$ -arches” conformation, commonly seen in amyloid fibrils<sup>20</sup>. The RHIM tetrad  
 223 sequence VQIG in the second  $\beta$ -strand, adopts very ordered side-chain conformations, with V448 and  
 224 I450 side-chains pointing to the first  $\beta$ -strand (Figure 5B). The side-chain amide groups of Q449 residues  
 225 are able to form the inter-molecular hydrogen bonds with an H...O distance of 1.97Å, as shown in the fibril  
 226 structure (Figure 5D). Aside from Q449, there are three asparagine residues (residue numbers 443, 444,  
 227 452) with side-chain amide groups also capable of forming intermolecular side-chain hydrogen bonds  
 228 (Figure 5D). The N454 side-chain has an intramolecular contact with G451 (Figure 5A), pulling the long tail  
 229 of the 3<sup>rd</sup>  $\beta$ -strand closer to the first 2  $\beta$ -strands, but it does not show such hydrogen bonds formation  
 230 between neighboring molecules here.



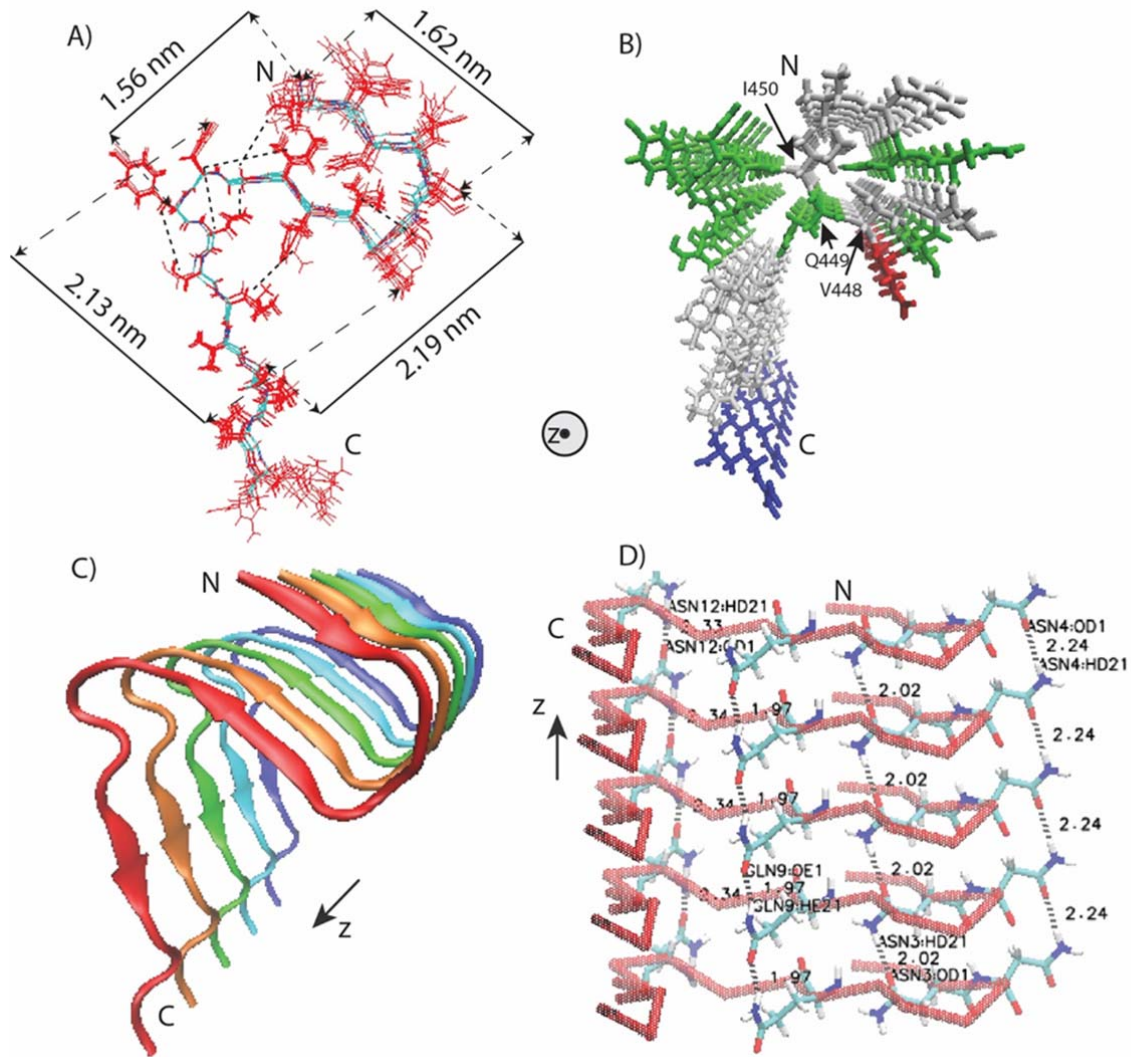

231

232

233 **Figure 5. Structural model of mouse RIPK3 fibril core.**

234 (A) Superposition of 10 monomer conformations with the lowest energy, calculated using XPLOR-NIH software. The dimension of the

235 structure is labeled on the sides. The unambiguous constraints used in the calculation are also marked using the dashed lines. (B) Stick

236 representation of the mouse RIPK3 fibril medoid model selected from 10 fibril structures with the lowest energy. Both (A) and (B) are

237 viewed down the fibril axes. (C) Side view of medoid model using cartoon representation. (D) Side view of medoid model indicating

238 possible hydrogen bonding between sides chains of N443, N444, Q449 and N452 (The labels in the figure are ASN3, ASN4, GLN9 and

239 ASN12). All figures were prepared using VMD (<https://www.ks.uiuc.edu/Research/vmd/>)<sup>21</sup>.

240

### 241 Individual Roles of the Three $\beta$ -strands in Mouse RIPK3 Fibrils

242 How important are the three  $\beta$ -strands in determining mouse RIPK3 function? Site-directed mutagenesis

243 of full-length mouse RIPK3 was carried out and the ability of different mutants to induce mouse cell

244 necroptosis was analyzed. TNF-induced necroptosis is mediated by RIPK1, RIPK3 and MLKL. RIPK1 and

245 MLKL are ubiquitously expressed in commonly used cell lines, and the cellular necroptotic response is  
 246 correlated with RIPK3 expression<sup>4,5</sup>. Ectopic expression of a functional RIPK3 can convert  
 247 necroptosis-resistant cells such as mouse NIH-3T3 or human HeLa cells to sensitive ones<sup>4,5</sup>. We  
 248 transfected NIH-3T3 cells with wild-type or mutant forms of mouse RIPK3. Comparing with the wild-type  
 249 RIPK3, the RIPK3 mutant replacing the 1<sup>st</sup>  $\beta$ -strand<sup>441VFNN<sup>444</sup></sup> or the 2<sup>nd</sup>  $\beta$ -strand<sup>448VQIG<sup>451</sup></sup> to four  
 250 alanine residues (AAAA) totally block cell necroptosis (Figure 6A) while changing the residues in 3<sup>rd</sup>  
 251  $\beta$ -strand of RIPK3 from<sup>455SLV<sup>457</sup></sup> to AAA only shows partially inhibition (Figure S6). Immunoprecipitation  
 252 assay indicated that the four-alanine mutations of 1<sup>st</sup> or 2<sup>nd</sup>  $\beta$ -strand totally inhibited the interaction  
 253 between mouse RIPK3 and RIPK1 (Figure 6B), indicating that the intermolecular interaction between  
 254 mouse RIPK3 and RIPK1 involves more than the conservative RHIM tetrad sequence<sup>448VQIG<sup>451</sup></sup>. Besides  
 255 that, single-site RIPK3 mutants F442D, Q449D and L456D exhibited almost 100% loss in cell necroptosis  
 256 (Figure 6A), similar as the whole 1<sup>st</sup> or 2<sup>nd</sup>  $\beta$ -strand replacement. Q449 at the center of RIPK3 RHIM is  
 257 especially important in stabilizing the fibril structure and determining its function, which has been indicated  
 258 by previous reports<sup>3</sup>. However, the importance of F442 and L456 have never been discussed.  
 259 Interestingly, more conservative mutations F442A, Q449A and L456A on mouse RIPK3 only decreased  
 260 cell necroptosis slightly (Figure S6), indicating a less change in the fibril structure for the conservative  
 261 mutations. Immunoprecipitation studies on RIPK3 mutants F442D, Q449D and L456D showed that the  
 262 intermolecular interaction between mouse RIPK3 and RIPK1 was not changed comparing to wild-type  
 263 RIPK3 (Figure 6B), different from the  $\beta$ -strand replacement. Therefore, the change caused by the  
 264 single-site mutation is not big enough to block the intermolecular interactions. However, the change did  
 265 inhibit the cell necroptosis, probably by affecting the correct folding of RIPK3 fibril.

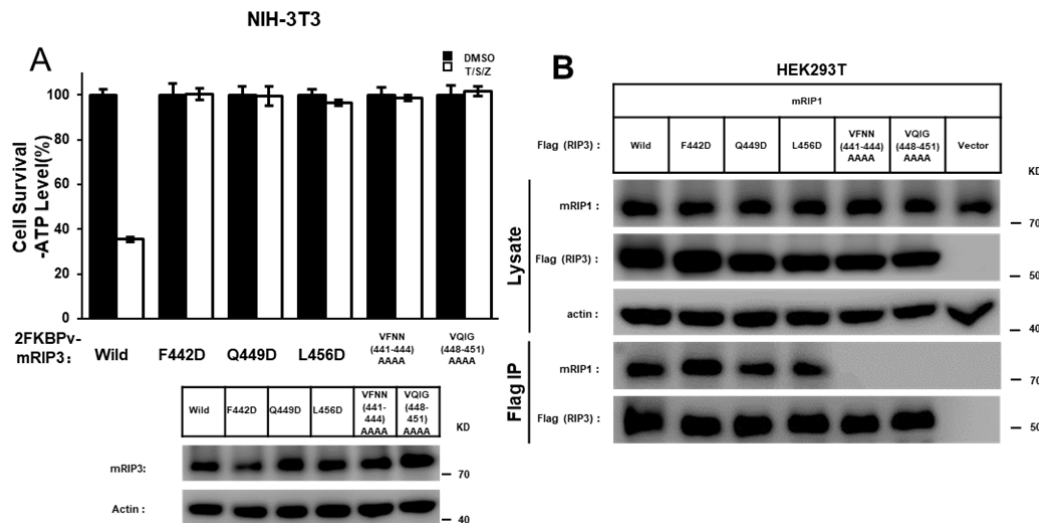

266  
 267 Figure 6 Cell-based functional assay. (A) Mutation of F442, Q449 or L456 to D, or quadruple alanine mutations of<sup>441VFNN<sup>444</sup></sup> or  
 268 <sup>448VQIG<sup>451</sup></sup> in RIPK3 led to the complete disruption of the TNF-induced cell necroptosis. The NIH-3T3 cells infected with lentivirus  
 269 containing FKBPv fused wild-type or mutant RIPK3 were treated with TNF- $\alpha$ /Smac/z-VAD (T/S/Z) 10 hr. The number of surviving  
 270 cells were determined by measuring ATP levels using Cell Titer-Glo kit (upper). The data are represented as the mean  $\pm$   
 271 standard deviation (SD) of duplicate wells. Aliquots of 20  $\mu$ g whole-cell lysates were subjected to SDS-PAGE followed by  
 272 western blot analysis of mouse RIPK3 and  $\beta$ -Actin which was shown as a loading control (lower). (B) The RIPK3 mutant F442D,  
 273 Q449D, L456D did not affect the interaction between mouse RIPK1 and mouse RIPK3. The HEK293T cells were co-transfected  
 274 with DNA plasmids containing mouse RIPK1 and Flag-tagged mouse RIPK3 (or its mutants). Cell lysates were collected 36h

275 post-transfection, and immunoprecipitated with anti-Flag magnetic beads (Bimake) at 4 °C. The total cell lysates and  
276 immunoprecipitates were analyzed by western-blot analysis with the indicated antibodies.

277

278 In order to gain a better understanding on the changes caused by single-site mutations, F442D, Q449D  
279 and L456D mutants with the same construction as the SSNMR sample (mouse RIPK3 409-486) were also  
280 prepared to check how the mutation could affect the fibril formation or structure *in vitro*. The fibril growth  
281 was monitored using THT binding fluorescence (Figure S7A). Q449D and L456D exhibit a gradual  
282 increase in the fluorescence intensity for almost 4 hours and the maximum intensity is still not observed  
283 after the incubation period. On the other hand, wild-type RIPK3 exhibit a rapid increase in fluorescence  
284 intensity in the first 20 min and the fluorescence intensity is stabilized after 60 min. F442D shows less  
285 fluorescence intensity, but still we could observe a slight increase of fluorescence with time till 60-80 min.  
286 The results indicate that mutants have a slower fibril growth rate compared to the wild-type protein. The  
287 final fluorescence profiles of fibril upon THT binding were shown in Figure S7B. Q449D shows a small  
288 change in the fluorescence intensity while L456D displays a significant increase in the fibril fluorescence  
289 intensity. F442D only exhibit little fluorescence, slightly above the blank buffer sample. The change in the  
290 fluorescence intensity of fibrils indicate a change of THT binding mode on the fibril, therefore, reflecting  
291 the structural changes of the fibrils. Finally, the formed fibrils were visualized using TEM (Figure S7C).  
292 TEM images indicate single-strand unbranched fibrils for all. Combined these results, it is clearly  
293 concluded that mutants not only have different fibril growth kinetics, but also have structural changes in  
294 the fibrils.

295

#### 296 The Transition Process from RIPK1-RIPK3 Binding to RIPK3 Self-assembly Formation

297 The functional studies above indicate that the necroptosis pathway requires RIPK1-RIPK3 intermolecular  
298 interaction and RIPK1/RIPK3 hetero-oligomer formation. Meanwhile the downstream necroptotic process  
299 could not be activated without the correct RIPK3 self-assembly formation. However, the RIPK1/RIPK3  
300 complex could not directly activate RIPK3 kinase activity and the downstream necroptosis pathway<sup>13</sup>. In  
301 order to build the connection between the RIPK1-RIPK3 binding and the mouse RIPK3 fibril structure and  
302 understand how the transition would occur, a molecular dynamics simulation was carried out using the  
303 experimental RIPK3 fibril structure as the template. Assuming a 1:1 ratio in the RIPK1-RIPK3 binding, half  
304 of the molecules in the fibril structure were replaced by mouse RIPK1. The secondary structure prediction  
305 of RIPK1 using PSIPRED shows three sequential  $\beta$ -strand segments with the RHIM tetrad sequence  
306 (<sup>528</sup>IQIG<sup>531</sup>) at the 2<sup>nd</sup>  $\beta$ -strand position (Figure S2B). The positions of the other two  $\beta$ -strands are also  
307 spaced similarly to those in mouse RIPK3. This fact strongly suggests that the mouse RIPK1/RIPK3  
308 hetero-amyloid would adopt the parallel in-register conformation seen in the human RIPK1/RIPK3  
309 hetero-amyloid with the tetrad sequence aligned to each other for the different molecules in the fibril. An  
310 MD simulation on the hetero-amyloid model was performed to investigate the stability of the RIPK1/RIPK3  
311 hetero-amyloid structure in the configuration of the homo-amyloid structure. As a comparison, the same  
312 MD simulation was also carried out for a pure mouse RIPK3 fibril.

313

314 The final structures of mouse RIPK3 homo-amyloid and RIPK1/RIPK3 hetero-amyloid with the lowest  
315 energy after 50 ps MD simulation are shown in figure 7A, 7C respectively. The MD simulation exhibits  
316 rather different results for these two cases. The mouse RIPK3 fibril develops a slight left-hand twist  
317 without much change in the "N"-shaped 3  $\beta$ -strands conformation. Interestingly, the N454 side-chain also  
318 switches to a conformation favoring the hydrogen bonding after the molecular dynamics run. The

319 hetero-amyloid, on the other hand, loses the “ $\beta$ -arches” formed by the first and second  $\beta$ -strand without  
 320 developing a fibril twists. This result clearly indicates that it is not stable for mouse RIPK1 and RIPK3 to  
 321 adopt the RIPK3 fibril structure upon the intermolecular interaction, however, the mouse homo-amyloid  
 322 structure is stable for itself. Our results suggest a structural transformation must occur for the mouse  
 323 RIPK3 hetero-amyloid to convert to the final RIPK3 homo-amyloid. A further comparison between the MD  
 324 relaxation structure of mouse RIPK1/RIPK3 hetero-amyloid and the published structure of human  
 325 RIPK1/RIPK3 hetero-amyloid shows very similar backbone orientations of the 1<sup>st</sup> and 2<sup>nd</sup>  $\beta$ -strand (figure  
 326 7D), suggesting mouse RIPK1/RIPK3 fibril might be able to adopt a structure similar to that of the human  
 327 RIPK1/RIPK3 fibrils. Based on this structural evidence, the signal transduction mechanism for the  
 328 necroptosis signaling during these steps is proposed in figure 7E. The hetero-oligomer of RIPK1/RIPK3 is  
 329 first formed upon TNF induction. While more RIPK3 molecules come to attach themselves to the  
 330 hetero-amyloid, RIPK3 conformation transforms and a homo-amyloid of RIPK3 gradually form. The  
 331 homo-amyloid structure then folds itself to a more compact, stable conformation with 3  $\beta$ -strands in the  
 332 molecule.  
 333

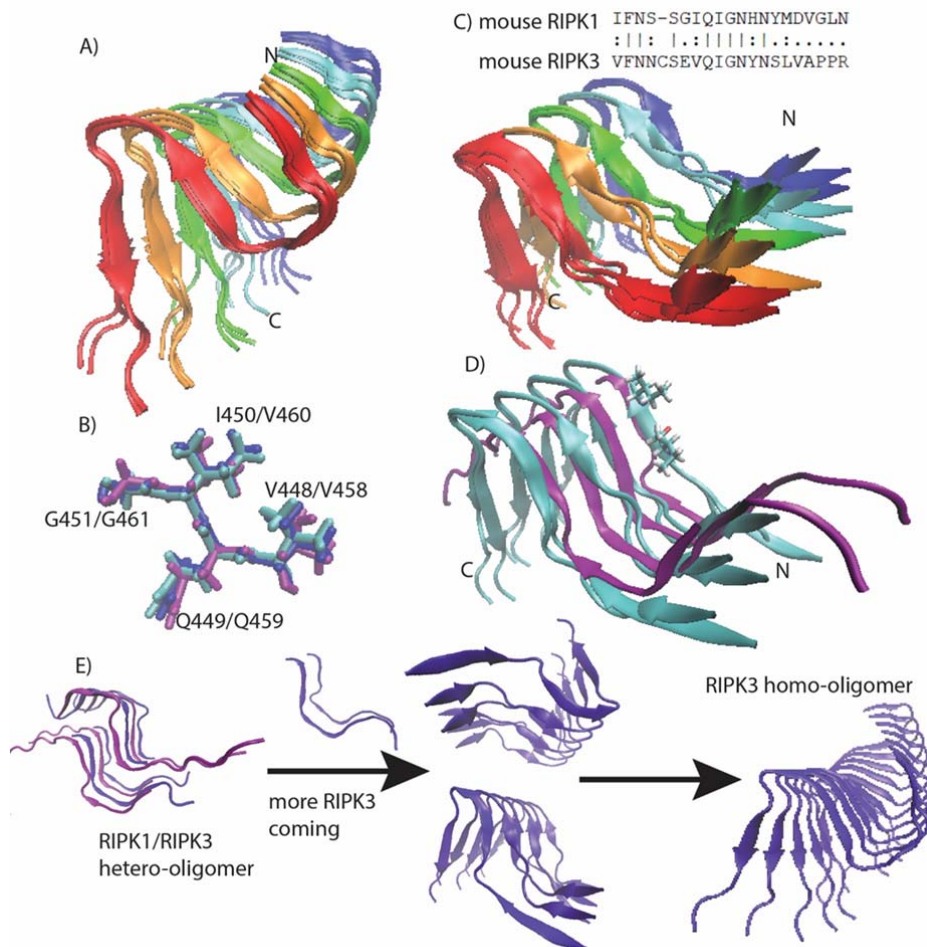

334 Figure 7. Molecular dynamics (MD) simulations on mouse RIPK3 fibrils and a hetero-amyloid model of mouse RIPK1/RIPK3  
 335 (A) The best 4 structures of mouse RIPK3 fibril after 50 ps MD, showing the fibril developing a left-hand twist. (B) The structure  
 336 alignment of RIPK3 conserved tetrad sequence from human RIPK1/RIPK3 hetero-amyloid structure (purple, 5v7z.pdb), mouse RIPK3  
 337 fibril structure (blue, 6JPD.pdb) and mouse RIPK3 fibril after 50ps MD from (A) (cyan). (C) The best 4 structures of mouse

338 RIPK1/RIPK3 hetero-amyloid after 50 ps MD run, showing the opening the  $\beta$ -arches formed by the 1<sup>st</sup> and 2<sup>nd</sup>  $\beta$ -strand. The mouse  
339 RIPK3 fibril structure was adopted as the starting configuration for the MD. The sequence alignment for mouse RIPK1 and RIPK3 is  
340 shown on the top. (D) The structure comparison between (C) (cyan, showing only the best 2 structures for clarity, residue V448, I450  
341 was also shown in one subunit) and RIPK1/RIPK3 from the human RIPK1/RIPK3 hetero-amyloid structure (purple, 5v7z.pdb). (E) The  
342 proposed mechanism showing RIPK3 structural transformation from initial RIPK1-RIPK3 binding to RIPK3 fibril formation.

343

## 344 Discussion

345 Our SSNMR structure of mouse RIPK3 fibrils reveal an “N”-shaped structure with three  $\beta$ -strands and a  
346 single copy of RIPK3 molecule in the fibril cross- $\beta$  unit. It shows the  $\beta$ -arch conformation with a  
347 strand-turn-strand motif which is a common feature in fibril structures<sup>20</sup>. The  $\beta$ -arch conformation is  
348 adopted by the first two  $\beta$ -strands of mouse RIPK3 fibril with residue <sup>445</sup>CSE<sup>447</sup> forming a three-residue  
349  $\beta$ -arc. The  $\beta$ -arches stack on each other, forming two  $\beta$ -sheets which interact with each other via the  
350 residue side chains. The third  $\beta$ -sheet adopts an orientation not parallel to the first two, more like a hairpin  
351 conformation. This morphology resembles to the published Het-s fibril structure from *Podospora anserina*  
352 (PDB:2KJ3 figure S1B), which was also provided by SSNMR<sup>22</sup>, Het-s fibril structure is relevant here  
353 because it also contains RHIM motif. The RHIM-containing sequence at the C-terminal region of protein  
354 HET-s could assemble into highly ordered amyloid fibrils, functioning in a type of programmed cell death,  
355 called heterokaryon incompatibility in filamentous fungi<sup>23-25</sup>. Therefore, the SSNMR structure of both  
356 RIPK3 and HET-s fibrils provides us high-resolution examples of functional amyloid containing RHIM  
357 domains.

358

359 In the human RIPK1/RIPK3 hetero-amyloid structure provided by SSNMR, the  $\beta$ -arch conformation is not  
360 formed, although the subunits are indeed arranged in a parallel in-register fashion (figure S1B). Our MD  
361 simulation of mouse RIPK1/RIPK3 structure model favors the human RIPK1/RIPK3 SSNMR structure but  
362 not our mouse RIPK3 SSNMR structure, suggesting a more stable conformation for the hetero-amyloid  
363 when the first two  $\beta$ -strands adopt an extended orientation (figure 7C, D). Moreover, the extended  
364 orientation between the first two  $\beta$ -strands exposes the hydrophobic residues (V448 and V450) in the  
365 second  $\beta$ -strand to solution (figure 7D). In order to maintain a hydrophobic environment for those residues,  
366 it would favor another copy of molecules to cover these residues. Therefore, an antiparallel interaction  
367 between two RIPK1/RIPK3 protofibrils forms as shown in the SSNMR structure of the human  
368 RIPK1/RIPK3 fibrils (Figure S1B). While in the SSNMR structure of RIPK3 fibrils, V448 and V450 of  
369 mouse RIPK3 are buried in the  $\beta$ -arch stabilized by the interactions between the first and the second  
370  $\beta$ -strand where inter-residue contacts between F442 and I450 and V441 and G451 are observed (Figure  
371 4B 4D 5A). Besides that, the second and third  $\beta$ -strand in mouse RIPK3 fibril forms a hairpin with strong  
372 contacts between the two  $\beta$ -strands shown by inter-residue cross peaks of Q449-L456 and G451-N454  
373 (Figure 4A, 4C 5A). Mutations on those important residues (F442D, Q449D and L456D) disturb the  
374 stability and interactions between these  $\beta$ -strands, preventing the cell necroptosis (Figure 6A). It suggests  
375 that both  $\beta$ -arch formed by the first two  $\beta$ -strands and the hairpin between the second and the third  
376  $\beta$ -strand are required for RIPK3 function. In the structure of human RIPK1/RIPK3 hetero amyloid, the  
377 orientations of the first two  $\beta$ -strands compose a flat turn and the segment corresponding to the third  
378  $\beta$ -strand in RIPK3 fibril is flexible. It suggests the intra-molecular interactions shown above between the  
379 three  $\beta$ -strands are not needed for RIPK1/RIPK3 hetero amyloid formation. Consistent with that the  
380 mutations of human RIPK1 (I533D or M547D) or RIPK3 (I452D or L466D) corresponding to mouse RIPK3  
381 mutations (F442D or L456D) did not disrupt the RIPK1/RIPK3 hetero fibrillar complex *in vitro*<sup>3</sup>. Our

382 Immunoprecipitation results also showed that F442D, Q449D and L456D did not affect the interaction  
383 between RIPK1 and RIPK3 while these mouse RIPK3 mutations did disrupt their necrosis function. Only  
384 the 4-residue segmental replacement into AAAA at <sup>441</sup>VFNN<sup>444</sup> (in the first  $\beta$ -strand) or <sup>448</sup>VQIG<sup>451</sup> (in the  
385 second  $\beta$ -strand) was significant to disrupt the RIPK1-RIPK3 binding (figure 6A and B). These pieces of  
386 evidence strongly suggest that the formation of hetero fibrils composed by RIPK1 and RIPK3 is necessary  
387 but not sufficient for RIPK3 dependent necroptosis. RIPK3 must transit to form the unique “N”-shaped  
388 fibrils to transduce the necrosis signal.

389

390 How does necrosis signal transit from upstream RHIM containing factors to RIPK3? Comparing the fibril  
391 structures of human RIPK1/RIPK3 and mouse RIPK3, we found the conformation of the 4-conserved  
392 residues I(V)QI(V/L)G in the second  $\beta$ -strand are nearly identical (figure 7B). It suggests the tetrad  
393 sequence of RIPK1 or other upstream RHIM-containing factors will fold as amyloidal nucleates to recruit  
394 the second  $\beta$ -strand of RIPK3 first. Consistently, mutations to replace the 4-conserved residues of either  
395 upstream factors including RIPK1 and TRIF or RIPK3 (figure 6A) will prevent the RIPK3 recruitment and  
396 cell necrosis <sup>3,26,27</sup>. Then, the second  $\beta$ -strand of RIPK3 RHIM behaves as the amyloid core, to induce the  
397 stacking of the first and the third  $\beta$ -strand to form a unique “N”-shaped structure (figure 7E). The RIPK3  
398 mutations (F442D, Q449D and L456D) that destabilize either the  $\beta$ -arch or the hairpin will destroy the “N”  
399 shape and prevent the cell necrosis. However, the RIPK3 mutant could still form amyloid fibrils *in vitro*  
400 (figure S7C). It again indicates the amyloid formation is necessary but not sufficient for RIPK3 signaling in  
401 necrosis pathway. The “N”-shaped RIPK3 amyloids may function to help the RIPK3 amyloids further  
402 assemble and/or play as a platform to recruit some unknown regulators to mediate the RIPK3 kinase  
403 activation and the downstream signaling of cell necrosis.

404

## 405 METHODS

406 Detailed methods are provided in the online version of this paper and include the following:

407

408 ● KEY RESOURCES TABLE

409 ● CONTACT FOR REAGENT AND RESOURCE SHARING

410 ● EXPERIMENTAL METHOD AND SUBJECT DETAILS

411 ● METHOD DETAILS

412 ○ Production of Mouse RIPK3 Protein

413 ○ Fibril Sample Preparation

414 ○ X-Ray Diffraction (XRD) from Fibrils

415 ○ Thioflavin T fluorescence binding assays

416 ○ Electron Microscopy

417 ○ Mass-per-length measurement of mouse RIPK3 fibril using Beam Tilted (BT)-TEM

418 ○ Atomic Force Microscope (AFM)

419 ○ H/D exchange experiment

420 ○ Solid-State NMR Experiments

421 ○ Calculation of Structural Models for Mouse RIPK3 Fibrils

422 ○ Molecular dynamic simulations

423 ○ Constructs and Transfection

424 ○ Cell Survival Assay

425 ○ Immunoprecipitation and Immunoblotting

426

427 ● QUANTIFICATION AND STATISTICAL ANALYSIS

428

429 SUPPLEMENTAL INFORMATION

430 Supplemental information includes eight figures, three tables.

431

432 AUTHOR CONTRIBUTIONS

433

434 This manuscript is completed under the efforts of all authors. Xia-lian Wu prepared all samples for the  
435 structural studies, took AFM images, captured the EM and BT-TEM dark-field images and SSNMR  
436 experiments; Hong Hu carried out the functional studies in cells; Xing-qi Dong helped in the EM images  
437 and the structural calculations; Jing Zhang collected fiber diffraction data; Jian Wang helped in SSNMR  
438 experiments; Jun-xia Lu, Hua-yi Wang, Xia-lian Wu and Hong Hu planned experiments and did data  
439 analysis; Jun-xia Lu, Xing-qi Dong and Charles Schwieters carried out the structure calculations; Xia-lian  
440 Wu, Hua-yi Wang and Jun-xia Lu wrote the manuscript.

441

442 FUNDING RESOURCES

443 The work is partially supported by grants from National Key R&D program of China (2017YFA0504804 to  
444 JXL), National Science Foundation of China (No. 31770790 to JXL and 31571427 to HYW). This work is  
445 also funded by the scientific research start-up of JXL from the school of life science, ShanghaiTech  
446 University. JW is sponsored by Yangfan program of Shanghai municipal government (19YF1433500).

447

448 ACKNOWLEDGMENTS

449

450 The authors thank Dr. Yan-fen Liu for gifting the plasmid. We thank Dr. Xin-yan Wang and Na Yu at the  
451 Analytical Instrumentation Center of the school of Physical Science and Technology (contract no.  
452 SPST-AIC10112914) at ShanghaiTech University for the assistance in the AFM and XRD experiments.  
453 We thank Dr. Hou-chao Tao for the aid in the HPLC instrument. Our TEM and NMR work were partially  
454 performed at National Center for Protein Science Shanghai, China and at the Bio-Electron Microscopy  
455 Facility, the Biomolecular NMR Facility of the School of Life Science, ShanghaiTech University. We thank  
456 Dr. Bin Wu and Hong-juan Xue from National Center for Protein Science Shanghai, China for the help on  
457 the NMR. We thank Dr. Qian-qian Sun and Dr. Dan-dan Liu from the facility of School of Life Science,  
458 ShanghaiTech University for the assistance on TEM. TMV was provided by the laboratory of Jun Yang at  
459 Wuhan Institute of Physics and Mathematics, Chinese Academy of Sciences. C.D.S is supported by the  
460 Intramural Research Program of the Center for Information Technology of the National Institutes of Health.  
461 The structural calculations were partially done using the high-performance calculation platform of  
462 ShanghaiTech University.

463

464 METHODS

465 KEY RESOURCES TABLE

466 Bacterial and Virus Strains

|                                         |                  |       |
|-----------------------------------------|------------------|-------|
| <i>Escherichia coli</i> Transetta (DE3) | TRANSGEN BIOTECH | CD801 |
| NIH-3T3 cells                           | ATCC             |       |
| HEK293T cells                           | ATCC             |       |

467 **Chemicals, Peptides, and Recombinant Proteins**

| REAGENT or RESOURCE             | SOURCE         | IDENTIFIER |
|---------------------------------|----------------|------------|
| mouse anti-Flag (M2) antibody   | sigma          |            |
| mouse anti-RIP3 antibody        | sigma          |            |
| mouse anti-RIP1 antibody        | BD Biosciences |            |
| FKBPv antibody                  | abcam          |            |
| anti- $\beta$ -Actin antibodies | MBL            |            |

468 **Deposited Data**

|                                           |            |             |
|-------------------------------------------|------------|-------------|
| atomic coordinates for mripk3 fibril core | This paper | PDB: 6JPD   |
| NMR chemical shifts for mripk3 fibrils    | This paper | BMRB: 36243 |

469 **Oligonucleotides**

| primer           | characters                                                                   | source            |
|------------------|------------------------------------------------------------------------------|-------------------|
| mripk3(409- 486) | Forward:5'GGAATTCCA/TATG( <i>Nde</i> I)CATCATCATCATCATG<br>TCCTCACCCCAAAGG3' | Sangon<br>Biotech |
| mripk3(409- 486) | Reverse:5'CCGC/TCGAG( <i>Xho</i> I)CTACTTGTGGA<br>AGGGCTGC3'                 | Sangon<br>Biotech |
| F442D mripk3     | Forward: CTTCAGAACAGTTGTTGTCGACGAGAGCCGGTGGC                                 | Sangon<br>Biotech |
| F442D mripk3     | Reverse: GCCACCGGCTCTCGTCGACAACAAGTCTGAAG                                    | Sangon<br>Biotech |
| Q449D mripk3     | Forward: GGAGTTGTAGTTCCCAATATCCACTTCAGAACAG                                  | Sangon<br>Biotech |
| Q449D mripk3     | Reverse: CTGTTCTGAAGTGGATATTGGAACTACAAGTCC                                   | Sangon<br>Biotech |
| L456D mripk3     | Forward: TCTGGTGGTGCTACATCGGAGTTGTAGTTCCCAATCTG                              | Sangon<br>Biotech |
| L456D mripk3     | Reverse: CAGATTGGGAACTACAAGTCCGATGTAGCACCACCAAGA                             | Sangon<br>Biotech |

470 **Recombinant DNA**

| Plasmid                 | construct                                                                                                        | source     |
|-------------------------|------------------------------------------------------------------------------------------------------------------|------------|
| p6His-mripk3(409-486)   | Codon optimized mus-ripk3(401-486) in pSMT with N-terminal 6his tagged                                           | this study |
| pCDH-CMV-MCS-EF1-copRFP | The WT and mutated RIPK1 and RIPK3 cDNAs were cloned into the modified lentiviral vector pCDH-CMV-MCS-EF1-copRFP | this study |
| Virus packing plasmid   | psPAX2 and pMD2.g                                                                                                | Addgene    |

471 **Software and Algorithms**

|             |                                                                                                                                                                       |  |
|-------------|-----------------------------------------------------------------------------------------------------------------------------------------------------------------------|--|
| Xplor-NIH   | <a href="https://nmr.cit.nih.gov/xplor-nih/download.cgi">https://nmr.cit.nih.gov/xplor-nih/download.cgi</a>                                                           |  |
| Sparky      | <a href="https://www.cgl.ucsf.edu/home/sparky">https://www.cgl.ucsf.edu/home/sparky</a>                                                                               |  |
| nmrPipe     | <a href="https://www.ibbr.umd.edu/nmrpipe">https://www.ibbr.umd.edu/nmrpipe</a>                                                                                       |  |
| Pymol       | <a href="https://pymol.org/2/">https://pymol.org/2/</a>                                                                                                               |  |
| Origin2018  | <a href="http://www.ks.uiuc.edu/Research/hamd/">http://www.ks.uiuc.edu/Research/hamd/</a>                                                                             |  |
| Topspin4.02 | <a href="https://www.bruker.com/service/support-upgrades/software-downloads/nmr.html">https://www.bruker.com/service/support-upgrades/software-downloads/nmr.html</a> |  |



|           |                                                                                                                 |  |
|-----------|-----------------------------------------------------------------------------------------------------------------|--|
| TALOS-N   | <a href="https://spin.niddk.nih.gov/bax/nmrserver/talosn/">https://spin.niddk.nih.gov/bax/nmrserver/talosn/</a> |  |
| ImageJ    | <a href="https://imagej.nih.gov/ij">https://imagej.nih.gov/ij</a>                                               |  |
| VMD       | <a href="https://www.ks.uiuc.edu/Research/vmd/">https://www.ks.uiuc.edu/Research/vmd/</a>                       |  |
| PSIPRED   | <a href="http://bioinf.cs.ucl.ac.uk/psipred/">http://bioinf.cs.ucl.ac.uk/psipred/</a>                           |  |
| WALTZ     | <a href="http://waltz.switchlab.org">http://waltz.switchlab.org</a>                                             |  |
| Clustalw2 | <a href="https://www.ebi.ac.uk/Tools/msa/clustalw2/">https://www.ebi.ac.uk/Tools/msa/clustalw2/</a>             |  |

472

473

#### 474 CONTACT FOR REAGENT AND RESOURCE SHARING

475 Further information should be directed to Hua-yi Wang ([wanghuayi@shanghaitech.edu.cn](mailto:wanghuayi@shanghaitech.edu.cn)) and Jun-xia Lu  
476 ([lujx@shanghaitech.edu.cn](mailto:lujx@shanghaitech.edu.cn)).

477

#### 478 EXPERIMENTAL METHOD AND SUBJECT DETAILS

##### 479 METHOD DETAILS

480

##### 481 Production of Mouse RIPK3 Protein

482 All RIPK3 constructs were subcloned into pSMT3 vector with a N-terminal 6×His tag. For mutant proteins  
483 (F442D, F442A, Q449D, Q449A, L456D, L456A), a QuikChange protocol was used to obtain the mutant  
484 protein sequence (Sangon Biotech, Shanghai). The required primers were designed according to the  
485 protocol provided in the QuikChange Manual. Polymerase Kod-201 (Toyobo, Shanghai), an enzyme with  
486 high fidelity, was used to amplify the plasmid with the primers so that the single-site mutant plasmid could  
487 be obtained through PCR. PCR product was digested with restriction enzymes DpnI (NEB, USA) for 1  
488 hour at 37 °C and then purified using DNA purification kit (Takara). The purified plasmid was then  
489 transformed into DH5α competent cells (Transgene, China). The mutations were all confirmed by the  
490 sequencing.

491 All proteins were expressed in *E. coli* Transetta (DE3) cells. Unlabeled protein was expressed in 1 L Luria  
492 broth medium (Sangon Biotech, Shanghai) supplemented with 100 mg/mL ampicillin (Sangon Biotech,  
493 Shanghai) and the cells were induced for expression at an OD<sub>600</sub> = 0.8-1.0 determined by a BIOMATE 3S  
494 UV-Visible Spectrophotometer (Thermo Fisher, USA). After 4 hr of induction at 37 °C with 0.8 mM  
495 Isopropyl β-D-Thiogalactoside (Sangon Biotech, Shanghai), cells were harvested by centrifugation at  
496 8,000 rpm for 10 min and lysed by high pressure nano homogenizer (FB-110X, Shanghai Litu Ins., China)  
497 at about 850 bar in a buffer containing 50mM Tris-HCl (pH 8.0), 300 mM NaCl, 2 mM phenylmethylsulfonyl  
498 fluoride (BBI Life Science), and 1 mM β-mercaptoethanol (Sigma). After centrifugation at 12,000 rpm for  
499 30 min, the pellet was dissolved in 20 mL dissolving buffer containing 6M guanidine hydrochloride  
500 (GudHCl) (General-Reagent, Shanghai Titan Scientific), 50 mM Tris-HCl (pH8.0) and 300 mM NaCl. The  
501 mixture was again centrifuged at 12,000 rpm for 30 min and the supernatant was incubated with Ni-NTA  
502 beads 6 FF (Smart-Life Science) at 4 °C for 30 min. The protein was later eluted from the beads using  
503 15-20 mL dissolving buffer containing 250 mM imidazole (Sangon Biotech, Shanghai). Then the protein  
504 solution was dialyzed using 1 L pure water at 4 °C with Spectra/por®6 Dialysis Membranes (MWCO 3.5  
505 K, W.45 mm, Diam 29 mm; BBI Life Science) and water was replaced twice after every 6 hours. The  
506 protein precipitation was harvested by centrifugation at 12000 rpm for 10 min and dissolved again using  
507 25% (v/v) acetic acid solution for further purification. The protein was finally purified by reverse phase  
508 high-performance liquid chromatography (Waters 2545) at room temperature with a linear gradient of  
509 30-70% aqueous-organic solvent over 10 min at 10 mL/min using the XBridge® Peptide BEH C18 column

510 (130Å pore, 5.0 µm beads, 19 mm×100 mm column, Waters). Aqueous phase was Milli-Q H<sub>2</sub>O with 0.05%  
511 TFA and the organic phase is acetonitrile with 0.05% TFA. The purified protein was flash-frozen in liquid  
512 nitrogen and dried at -80 °C. Protein concentrations were determined by absorbance at wavelength of  
513 280 nm.

514 The uniformly labeled protein, [<sup>13</sup>C, <sup>15</sup>N]-labeled mouse RIPK3, was expressed in the freshly prepared M9  
515 medium containing 1.5 g/L <sup>15</sup>N-ammonium chloride and 2 g/L <sup>13</sup>C-glucose (Cambridge Isotope  
516 Laboratories), 1 mL/L BME vitamins (Sigma-Aldrich B6891), 0.2 M CaCl<sub>2</sub>, 2 M MgCl<sub>2</sub>, 50 mg/L Thiamine.  
517 The culture grew first in 500 mL LB medium with shaking (220 rpm) at 37 °C to the cell density of about  
518 OD<sub>600</sub>=1.0. Cells were then collected by centrifugation at 4 °C and resuspended in the freshly made M9  
519 medium. After the cells' recovery for 30 min at 37 °C, the protein expression was induced using 0.8 mM  
520 isopropyl β-d-1-thiogalactopyranoside for 4 hr at 37 °C with shaking at 220 rpm. The protein was purified  
521 with the same method described above.

522 For [<sup>12</sup>C, <sup>15</sup>N]-labeled protein, the expression medium use 1.5 g/L <sup>15</sup>NH<sub>4</sub>Cl and 2 g/L <sup>12</sup>C-glucose as the  
523 nitrogen and carbon source; For [<sup>13</sup>C;<sup>14</sup>N]-labeled protein, the expression medium use 1.5 g/L <sup>14</sup>NH<sub>4</sub>Cl and  
524 2 g/L <sup>13</sup>C-glucose as the nitrogen and carbon source. And for sparsely <sup>13</sup>C-, uniformly <sup>15</sup>N-labeled proteins,  
525 [2-<sup>13</sup>C]-glycerol or [1,3-<sup>13</sup>C]-glycerol was used as the carbon source.

526

#### 527 Fibril Sample Preparation

528 Lyophilized protein powder was first dissolved in 6M GudHCl solution (pH=7.5) at a concentration of 1  
529 mg/mL. The protein solution was incubated for 1 hr to make sure the fully dissolving of the protein. It was  
530 then overnight dialyzed in Milli-Q water at room temperature with Spectra/por@6 Dialysis Membranes  
531 (MWCO 3.5 K, W.45 mm, Diam 29 mm; BBI Life Science). The pH of Milli-Q water used was adjusted to  
532 7.5 using 1M NaOH buffer. Water was then changed every 6 hr for additional three times. During the  
533 process, protein fibrils formed gradually. After keeping the sample in the dialysis membrane for 3 days,  
534 protein pellets were then collected by ultracentrifugation at 55000 rpm, 25 °C for 1 hr. (Optima Max-TL,  
535 BECKMAN COULTER). For protein fibril preparation using [<sup>12</sup>C, <sup>15</sup>N]- and [<sup>13</sup>C, <sup>14</sup>N]-labeled protein, [<sup>12</sup>C,  
536 <sup>15</sup>N]-labeled protein and [<sup>13</sup>C; <sup>14</sup>N]-labeled protein were prepared separately and mixed in 1:1 mole ratio  
537 before further dialysis to remove GudHCl.

538

#### 539 X-Ray Diffraction (XRD) from Fibrils

540 The fibril pellet was mounted in a loop and exposed to Cu  $\kappa\alpha$  radiation from a Bruker D8 VENTURE X-ray  
541 diffractometer at 0.154184 nm wavelength, distance 50 mm. Data were collected at room temperature for  
542 1 min on a Bruker D8 VENTURE imaging plate detector.

543

#### 544 Thioflavin T fluorescence binding assays

545 ThT binding assay was performed to monitor the kinetics of fibril growth for mouse RIPKs and its mutant  
546 using a Perkin-Elmer EnSight Multimode Plate Reader with a Costar 96-well plate (Corning). The  
547 excitation wavelength was at 430 nm and the emission was monitored at 485 nm. ThT was at a  
548 concentration of 50 µM and protein fibrilization was carried out by diluting 2mM protein stock solution in  
549 6M GudHCl to a final concentration of 20µM in a 200µL volume using 10mM PB buffer (pH7.4). The data  
550 were collected by measuring fluorescence intensity continuously for about 4 hours at room temperature  
551 and were plotted using Origin2018. The fluorescence profile of RIPK3 fibrils from 450 nm to 600 nm was  
552 also obtained.

553

554 Electron Microscopy

555 5  $\mu\text{L}$  of the fibril suspension was dropped onto a 300-mesh carbon-coated grid (Beijing Zhongjingkeyi  
556 Technology). The solution was kept for 5 min on the grid before wicked off by filter paper. The grid was  
557 washed twice by 5  $\mu\text{L}$  Milli-Q water and stained with 5  $\mu\text{L}$  2% uranyl acetate in water (w/v) for negative  
558 staining. Then the excess of liquid was blotted off and the grid was allowed to air dry. TEM images were  
559 recorded using Tecnai G2 Spirit Transmission Electron Microscope operating at 120 keV.

560

561 Mass-per-length measurement of mouse RIPK3 fibril using Beam Tilted (BT)-TEM

562 Mouse RIPK3 fibrils mixed with diluted TMV (generously provided by the laboratory of Jun Yang at Wuhan  
563 Institute of Physics and Mathematics, Chinese Academy of Sciences) were adsorbed onto a 200-mesh  
564 carbon-coated copper grid with the carbon film 3-5 nm in thickness. Images were acquired by a Talos  
565 L120C TEM at an acceleration voltage of 120kV. BT-TEM images were taken at 36000 $\times$  magnification,  
566 using a beam tilt of 1.2 $^\circ$ , a 70  $\mu\text{m}$  diameter objective aperture, a 150  $\mu\text{m}$  diameter condenser aperture and  
567 a spot 2 setting with a filament current of about 5  $\mu\text{A}$ . The dose rate was 15-20 e/nm $^2$ •s when taking the  
568 images which were later stored as 8-bit tiff files. Images were analyzed with ImageJ (NIH) and MPL values  
569 were calculated based on the reference<sup>18</sup>. We obtained 147 MPL counts from 6 dark-field images with  
570 each rectangle size of 60 nm  $\times$  120 nm. MPL error analysis were also calculated according to the method  
571 in the reference with 139 counts.

572

573 Atomic Force Microscope (AFM)

574 5  $\mu\text{L}$  of 50 times diluted fibril solution was deposited onto the freshly cleaved mica surface and incubated  
575 for 5 min at room temperature. The mica sheets were subsequently rinsed twice with 10 $\mu\text{L}$  Milli-Q water to  
576 remove the unbound material and air dried. All imaging was performed under dry conditions in a tapping  
577 mode using 0.01-0.025 Ohm-cm n-type Antimony(n) doped Si cantilevers (model RTESPA-300, Bruker,  
578 US) at about 300 kHz on a Dimension Icon AFM with Bruker Nano scope V controller (Digital Instruments,  
579 Goleta, CA, USA). The images were recorded at a scan rate of 1 Hz, acquiring 256 points per line and 256  
580 lines over a 1  $\mu\text{m}^2$  area. Fibril diameters were estimated using the fibril height measured from the AFM  
581 images subtracting the average baseline in a 1  $\mu\text{m}$  section across the fibril. The final value is the result of  
582 21 measurements on eight different fibrils in four different images.

583

584 Solid-State NMR Experiments

585 All magic angle spinning (MAS) SSNMR experiments were carried out on a 16.45 T (700 MHz  $^1\text{H}$   
586 frequency) Bruker AVANCE NEO spectrometer. A 3.2 mm triple-resonance HCN MAS probe was used.  
587 All experiments were conducted at 303 K with MAS rate ( $\omega_r$ ) of 15kHz.  $^{13}\text{C}$  chemical shifts were externally  
588 referenced to DSS using the published shift of adamantane (40.48 ppm for downfield  $^{13}\text{C}$  signal). And  $^{15}\text{N}$   
589 chemical shifts were referenced to liquid ammonia (0.00 ppm of  $\text{NH}_3$ ) using the IUPAC relative frequency  
590 ratios between DSS ( $^{13}\text{C}$ ) and liquid ammonia ( $^{15}\text{N}$ ). All spectra were processed using topspin and  
591 analyzed using the program Sparky<sup>28</sup>.

592 For  $^{13}\text{C}$ - $^{13}\text{C}$  2D correlation experiments, the Hartman-Hahn cross polarizations (CP) were done with a  $^{13}\text{C}$   
593 field strength of 51.2 kHz and the  $^1\text{H}$  field strength adjusted to near the n = 1 Hartman-Hahn condition,  
594 68.2 kHz. The CP contact time was 1.5 ms. The  $^1\text{H}$  and  $^{13}\text{C}$  hard pulse radio frequency (rf) field strengths  
595 were 83.3 kHz and 75.7 kHz, respectively. Dipolar-assisted rotational resonance (DARR) (Takegoshi et.  
596 al. 2001) was applied for  $^{13}\text{C}$ - $^{13}\text{C}$  polarization transfer with mixing time of 50 ms, 200 ms and 500 ms.  
597 SPINAL-64 decoupling<sup>29</sup> was employed during t1 and t2 increment with a  $^1\text{H}$  rf-field strength of 83.3 kHz.

598 For 2D NcaCX and NcoCX, the  $^1\text{H}$ - $^{15}\text{N}$  CP was done using the  $^{15}\text{N}$  field strength of 50 kHz and the  $^1\text{H}$  field  
599 strength adjusted to near the  $n = 1$  Hartman-Hahn condition. For the SPECIFIC CP transfer <sup>30</sup>, a mixing  
600 time of 4.5ms was used with rf-field strengths about  $2.7 \omega_r$  ( $^{15}\text{N}$ ) and  $1.7\omega_r$  ( $^{13}\text{C}$ ) for NCA, and  $1.7 \omega_r$  ( $^{15}\text{N}$ )  
601 and  $2.7\omega_r$  ( $^{13}\text{C}$ ) for NCO. respectively. A DARR sequence of 50 ms mixing time was used for subsequent  
602  $^{13}\text{C}$ - $^{13}\text{C}$  polarization transfer. During acquisitions, a TPPM  $^1\text{H}$  decoupling scheme with rf field of 87.72 kHz  
603 was applied <sup>31</sup>.

604 For z-filtered transferred echo double resonance (z-filtered TEDOR) experiment <sup>32</sup>, the  $^{13}\text{C}$  and  $^{15}\text{N}$  hard  
605 pulse rf field strengths were 75.7 kHz and 50 kHz, respectively. During the magnetization transfer,  $^{15}\text{N}$   $\pi$   
606 pulse length was phase cycled according to the xy-4 scheme. The z-filtered time was 200  $\mu\text{s}$ .  $^{13}\text{C}$  - $^{15}\text{N}$   
607 TEDOR mixing time was set to 3.2 ms, 6.4ms and 8.5ms, respectively.

608 2D  $^1\text{H}$ - $^{13}\text{C}$  insensitive nuclei enhancement by polarization transfer (INEPT) <sup>33</sup> was carried out for detecting  
609 the mobile part of the fibrils. The J-coupling value was set to 140 Hz for the general  $^1\text{H}$ - $^{13}\text{C}$  transfer. The  
610 waltz decoupling of 20 kHz was employed on  $^1\text{H}$  channel during acquisition. INEPT- $^{13}\text{C}$ - $^{13}\text{C}$ -total  
611 through-bond-correlation spectroscopy (INEPT-TOBSY) experiment <sup>34,35</sup> was carried out with a TOBSY  
612 mixing time of 11.2 ms using the P9<sub>6</sub> mixing sequence.

### 613 Calculation of Structural Models for Mouse RIPK3 Fibrils

614 Structure calculations were performed using simulated annealing with the Xplor-NIH package <sup>36</sup>. Two  
615 rounds of calculations were carried out. Mouse RIPK3 molecule residues V441-P460 were used in the  
616 calculation since those residues had chemical shifts assignments and TALOS-N predictions of protein  
617 dihedral angle values. In these calculations each RIPK3 subunit is assumed to have the exactly same  
618 conformation. To enforce this condition, the strict symmetry module (symSimulation) in the Xplor-NIH  
619 package (2.48) was utilized to reduce the computational cost, where only a single copy of protomer  
620 coordinates were maintained <sup>37</sup>. In total, 5 copies of the monomer subunit were used in the calculation to  
621 represent a short fibril segment, where 4 subunit copies were generated from a protomer using rigid body  
622 translations; non-zero twist angle was not considered.

623 In the first round of calculation, 108 independent structures were calculated from starting coordinates  
624 having different, random torsion angles and packing. The protocol contains first torsion-angle dynamics  
625 for a duration of 10 ps or 5000 timesteps at 4000K, followed by annealing to 25K in decrements of 12.5K  
626 for 20ps or 2000 timesteps of torsion-angle dynamics at each temperature and finally 500 steps of energy  
627 minimizations in torsion angle and Cartesian coordinates. The calculation was done on the high-  
628 performance calculation platform of ShanghaiTech University. Based on MPL data, there is only one  
629 protofibril in a mature fibril structure. Backbone torsion angles (using the CDIH potential) were restrained  
630 using predictions from both TALOS-N <sup>19</sup> and TALOS+ <sup>38</sup>. Although the TALOS-N predicted values were  
631 used for the structure calculations, only those predictions whose values agreed within 20 degrees were  
632 used and the uncertainties were expanded to accommodate the differences between the two methods.  
633 Intermolecular distance restraints (using the NOEPot potentials) were applied between neighboring  
634 subunits for the N444C $\beta$ , V448C $\beta$  and S455CO atoms, using a carbon-carbon distance of  $4.75 \pm 0.1 \text{ \AA}$ , and  
635 explicitly representing intermolecular hydrogen bonds between N444NH and N443CO, C445NH and  
636 N444CO, Q449NH and V448CO, I451NH and G450CO and L456NH and S455CO, using  
637 hydrogen-oxygen distances of  $2.3 \pm 0.1 \text{ \AA}$  and nitrogen-oxygen distances of  $3.3 \pm 0.1 \text{ \AA}$ . These intermolecular  
638 bonds were employed so that the resulting fibrils are consistent with the 4.7  $\text{ \AA}$  peak seen in X-ray powder  
639 diffraction. Intramolecular long-range distance restraints were obtained from 2D  $^{13}\text{C}$ - $^{13}\text{C}$  correlation using  
640 200 ms or 500 ms DARR mixing (distance restraint values:  $5.5 \pm 1.5 \text{ \AA}$ ) and z-filtered TEDOR with  $^{13}\text{C}$  - $^{15}\text{N}$   
641 recoupling time 6.4 ms (distance restraint values:  $4.5 \pm 2.5 \text{ \AA}$ ), and comprised 10 unambiguous restraints

642 between the pairs V441C $\gamma$ -G451C $\alpha$ , S446C $\beta$ -V448C $\beta$ , Q449C $\delta$ -L456C $\beta$ /C $\gamma$ , I450C $\gamma$ -N452C $\alpha$ ,  
643 G451C $\alpha$ -N454N $\delta$ , N452C $\alpha$ /C $\beta$ -N454C $\alpha$ , Y453C $\beta$ -S455C $\beta$ , L456C $\gamma$ -Q449N $\epsilon$ 2. Long-range distance  
644 restraints with low ambiguity from DARR and TEDOR were also used in the first round calculation, usually  
645 with one site having a unique assignment and the other site having two possible assignments. Aside from  
646 the experimentally-based dihedral and distance restraint terms, the knowledge-based TorsionDB <sup>39</sup>,  
647 low-resolution residueAff <sup>40</sup> contact terms, along with the standard purely repulsive nonbonded RepelPot  
648 (Schwieters et al., 2018) and covalent bond, bond-angle and improper dihedral terms were used in this  
649 initial docking calculation. The best 5 structural models with the lowest energy were retained for the  
650 second round of structure calculation.

651 The second refinement round of calculation was similar to the initial folding calculation except that the  
652 RepelPot term was replaced by the EEFx <sup>41</sup> implicit solvent force field. 5 side-chain  $\chi$  values from  
653 TALOS-N predictions were also added into the CDIH potential term to improve the side-chain  
654 conformation. Long-range distance restraints with high ambiguity from DARR and TEDOR were  
655 introduced where neither sites had unique assignments. The values used in the distance restraints with  
656 low ambiguity and high ambiguity in the refinement were set to be  $5.5 \pm 2.5\text{\AA}$ . A total of 200 structures  
657 were calculated and the best 10 structures with the lowest energy were validated at  
658 <https://validate.rcsb-1.wwpdb.org/> <sup>42</sup>. Structural statistics are shown in Table S3. The mouse RIPK3 fibril  
659 structural models were deposited into the Protein Data Bank with the PDB ID:6JPD.

660

#### 661 Molecular Dynamic (MD) Simulations

662 The docking of mouse RIPK1 into the RIPK3 fibril was also carried out with Xplor-NIH, using the RIPK3  
663 fibril medoid model as the template. A mouse RIPK3 fibril with 10 subunits was first generated and every  
664 other one subunit then replaced by a mouse RIPK1 molecule. The RIPK3 and RIPK1 molecules were  
665 aligned at the tetrad sequence for the 2<sup>nd</sup>  $\beta$ -strand, however, two alignments would still be possible for  
666 RIPK1 and RIPK3 at the 1<sup>st</sup>  $\beta$ -strand (Figure 7C and Figure S8). The docking for both alignments were  
667 carried out for comparison. An all-atom energy minimization of 1ps was then carried out in which the  
668 positions of the backbone atoms of the two RIPK3 subunits were restrained to remain within 1  $\text{\AA}$  of their  
669 initial positions using PosDiffPot (Schwieters et al., 2018). In the energy minimization, the XplorPot,  
670 TorsionDB, implicit solvent (EEFxPot) <sup>43</sup> and covalent energy terms were also included. Minimization was  
671 followed by 1 ps of MD with randomized initial velocities appropriate to 300 K for initial equilibration. After  
672 this, the PosDiffPot was disabled and MD was performed for 50 ps at 300K. A total of 96 runs were  
673 performed for each of the mouse RIPK3 and the two RIPK1/RIPK3 docking models of the fibril. The best 4  
674 structures were shown for comparison.

675

#### 676 Constructs and Transfection

677 For lentivirus production, the wild-type and mutated RIPK3 cDNAs were cloned into the modified lentiviral  
678 vector pCDH-CMV-MCS-EF1-copRFP. HEK293T cells were seeded on 10 cm dishes and cultured to 70%  
679 confluence. The cells then were transfected with the prepared lentiviral vectors and virus packing  
680 plasmids (psPAX2 and pMD2.g, Addgene) by using EZ transfection reagents (Shanghai Life-iLab Biotech  
681 Co., Ltd). The virus-containing medium was harvested 48 hours later and added to the NIH-3T3 cells as  
682 indicated with 10  $\mu\text{g/ml}$  polybrene. The infection medium was changed with fresh medium 24 hours later.  
683 Cells with stable expressed RIPK3 were selected at 72 hr post infection by FACS.

684

#### 685 Cell Survival Assay

686 TNF- $\alpha$  recombinant protein, z-VAD and Smac mimetic compound were used as described previously <sup>7</sup>.  
687 NIH-3T3 Cells with wild-type or mutant RIPK3 expression were cultured to 90% confluence, then they  
688 were digested and seeded in 96-well plates. Approximately 6000 cells were seeded in each well, including  
689 two duplicate wells. After 12 hours, necroptosis was induced by adding the final concentrations of 10  
690 ng/ml TNF- $\alpha$  (T), 100 nM Smac mimetic (S), and 20  $\mu$ M z-VAD (Z) to the cell culture wells. After 10 hours,  
691 cell survival was determined by measure cellular ATP level with the CellTiter-Glo Luminescent Cell  
692 Viability Assay kit. A CellTiter-Glo Luminescent Cell Viability Assay (Promega) was performed according  
693 to the manufacturer's instructions. Luminescence was recorded with an EnSpire Multimode Plate Reader  
694 from PerkinElmer.

695

#### 696 Immunoprecipitation and Immunoblotting

697 HEK293T Cells were cultured on 10 cm dishes and grown to 75% confluence, then transfected with DNA  
698 plasmids containing mouse RIP1 and Flag-tagged wild-type or mutant mouse RIP3 using EZ transfection  
699 (Shanghai Life-iLab Biotech Co., Ltd.). Thirty-six hours later, cells treated as indicated were washed once  
700 with DPBS and harvested by scraping and centrifugation at 1000 x g for 3 min The harvested cells were  
701 washed once with DPBS and lysed for 30 min on ice in lysis buffer containing 25 mM Hepes-NaOH (pH  
702 7.5), 150 mM NaCl, 1% Triton, 10% glycerol, and complete protease inhibitor (Roche) and phosphatase  
703 inhibitor (Sigma) cocktails. The cell lysates were then centrifuged at a top speed of 12,000 x g for 30 min  
704 at 4 °C. The soluble fraction was collected, and the protein concentration was determined by a Bradford  
705 assay. For immunoprecipitation, 1 mg of extracted protein in lysis buffer was immunoprecipitated  
706 overnight with anti-Flag magnetic beads (Bimake) at 4 °C. After incubation, the beads were washed three  
707 times with lysis buffer, then directly boiled in 1X SDS loading buffer and subjected to immunoblot analysis.  
708 For protein expression analysis in cell survival experiments, the samples were subjected to SDS-PAGE  
709 and detected using antibodies as indicated.

710

#### 711 QUANTIFICATION AND STATISTICAL ANALYSIS

712 6 samples were prepared for the mouse RIPK3 SSNMR structure determination, which showed the consistent  
713 NMR shifts. AFM image shown in Figure 1E was a representative image of 9 images from 3 sample preparations  
714 and BT-TEM in Figure 1G was a representative image of more than 30 images from about 10 sample  
715 preparations. Thioflavin T binding assays on fibril growth were carried out 4 times and gave the consistent  
716 results. Cell survival assay, immunoprecipitation and immunoblotting were also repeated 3 times.

717

## 718 Supplemental Figures and Tables

719

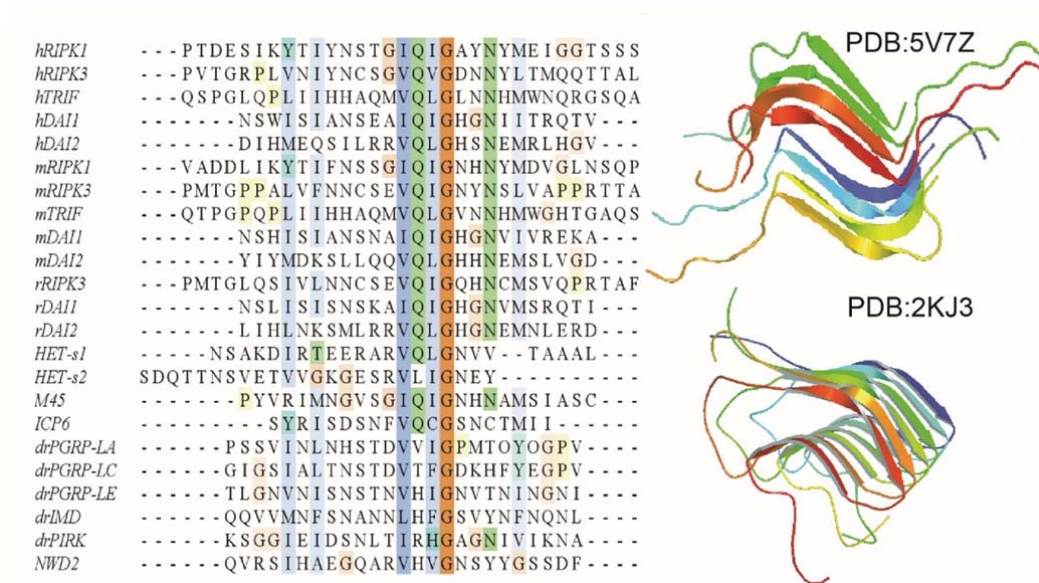

720

721

722

723

724

725

726

727

Figure S1. Alignment of RHIM sequence from various proteins and the published structures containing of RHIM. (A) Alignment of RHIM sequence of human (h), mouse (m), rat (r), drosophila (dm) and herpesviruses (M45, ICP6) proteins and prion-forming domain of *P. anserine* proteins (Het-s1, Het-s2). The most conserved tetrad sequenced is highlighted at the center. The alignment was performed by clustalw2 online software. Receptor interacting protein kinase 1 (RIPK1), toll-interleukin-1 receptor domain-containing adapter protein inducing interferon beta (TRIF) and DNA-dependent activator of interferon-regulatory factors (DAI) are three proteins found in necroptosis pathway. (B) The SSNMR structures of human RIPK1/RIPK3 hetero-amyloid (PDB:5V7Z) and Het-s fibrils (PDB:2KJ3).

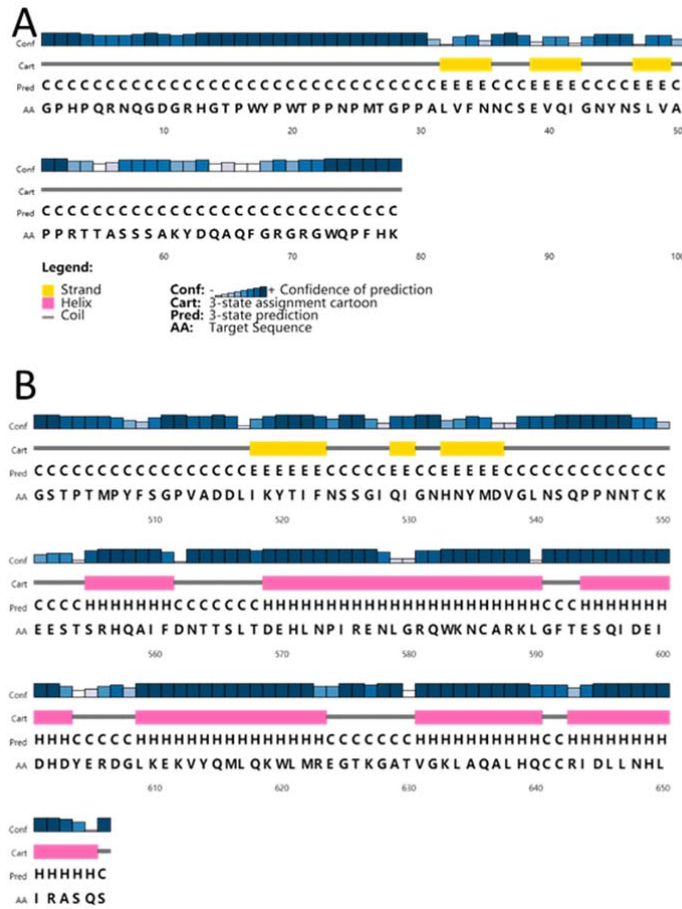

728

729

730

Figure S2. The secondary structure prediction using PSIPRED indicating 3  $\beta$ -strands at RHIM domain. (A) mouse RIPK3

731

sequence. (B) mouse RIPK1 sequence. The RHIM tetrad is the 2<sup>nd</sup>  $\beta$ -strand for both RIPK1 and RIPK3.

732

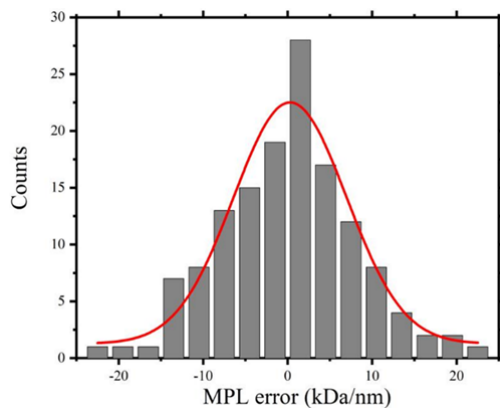

733

734

Figure S3. The image background analysis for MPL measurement of mouse RIPK3 fibrils. The error were calculated by the same

735

method described in the article<sup>18</sup>. We obtained 139 MPL error counts through measurement of the background intensity in the dark

736

field images. Each reading was obtained for a rectangle with 60 nm $\times$ 120 nm in size, same size as what was used in obtaining MPL

737

values. Data was analyzed and plotted by Origin2018 with Gaussian fitting. The best-fit Gaussian function displays a width of 15.7

738

kDa/nm (full-width-at-the-half-height).



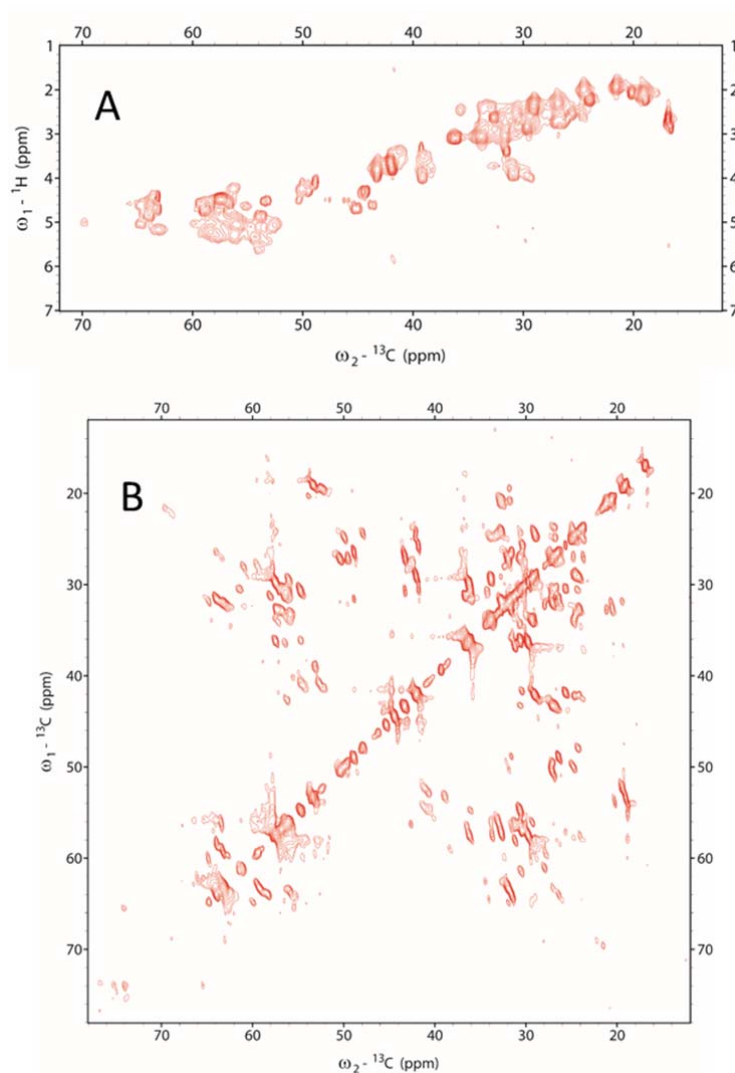

739

740 Figure S4. INEPT (A) and INEPT-TOBSY (B) spectra of mouse RIPK3 fibrils.

741

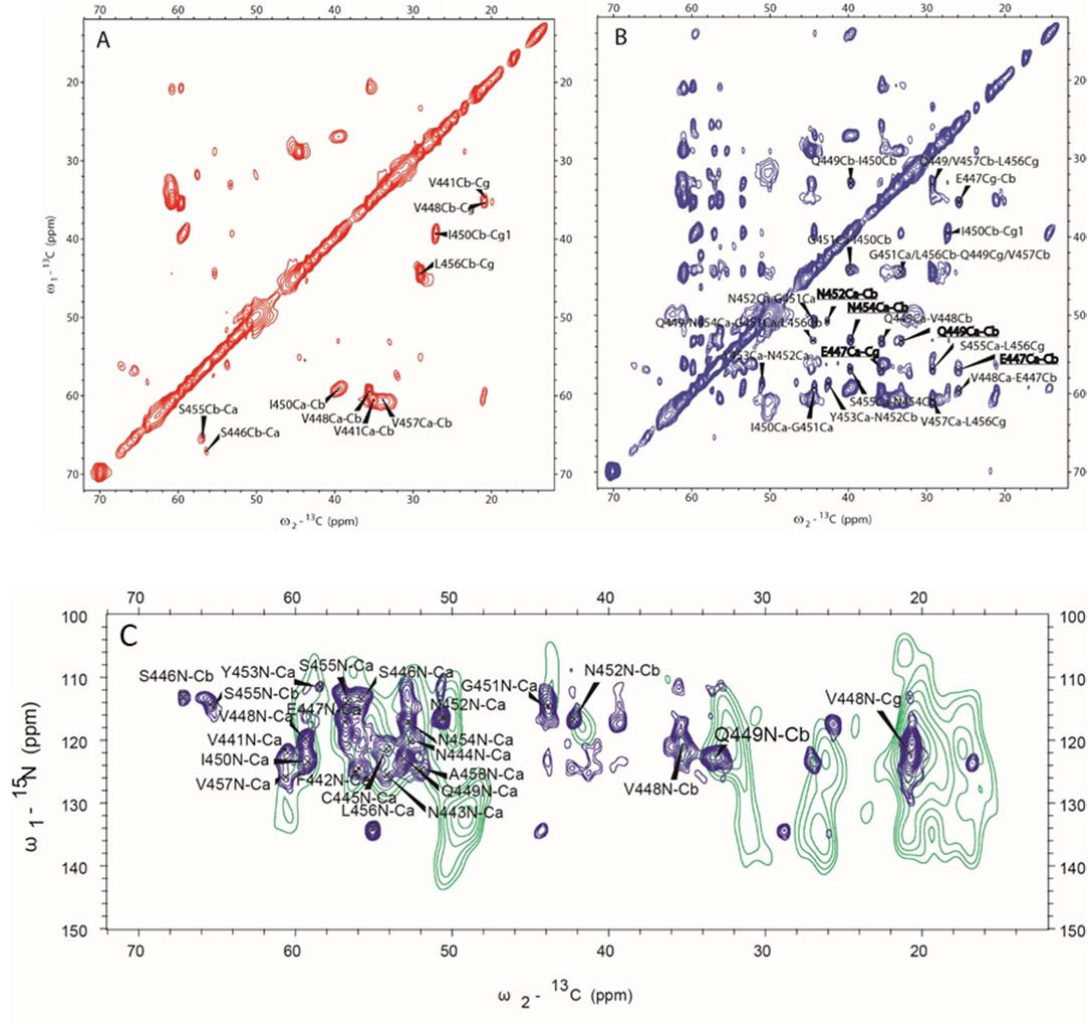

742

743 Figure S5. SSNMR confirming the parallel in-register  $\beta$ -sheet conformation of mouse RIPK3 fibril. Comparison of 2D  $^{13}\text{C}$ - $^{13}\text{C}$

744 correlation spectra of sparsely  $^{13}\text{C}$ -labeled mouse RIPK3 fibrils using  $[2\text{-}^{13}\text{C}]$ -labeled glycerol (A) 50 ms DARR mixing and (B)

745 500ms DARR mixing. (C) Comparison of  $^{15}\text{N}$ - $^{13}\text{C}$  spectra, Z-filtered TEDOR with 8.5 ms recoupling in green was carried out at 252K

746 using fibrils with mixed labeling ( $^{13}\text{C}$ : $^{15}\text{N}$  =1:1) while 2D NCaX in blue was carried out at room temperature using uniformly

747  $[^{13}\text{C}, ^{15}\text{N}]$ -labeled fibrils.

748

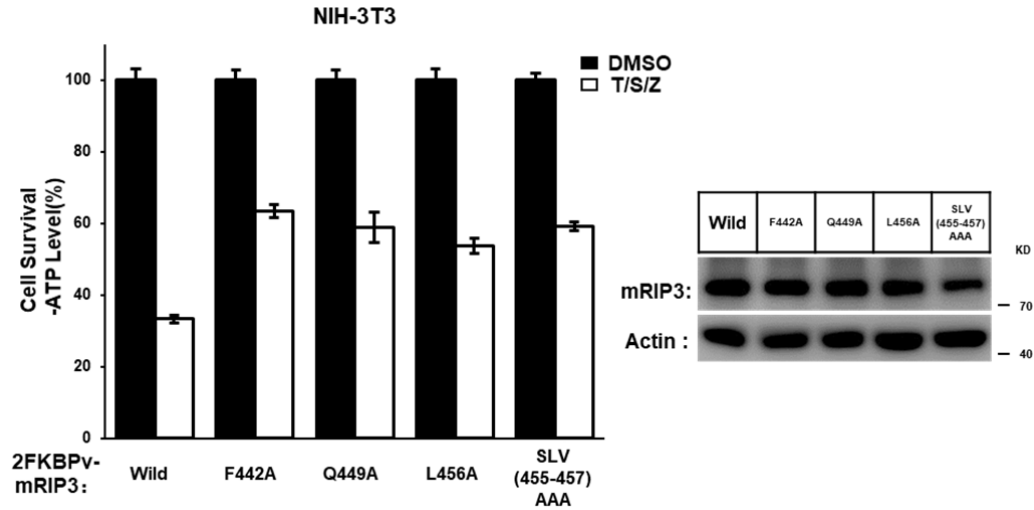

749

750 Figure S6 A: Mutation of Phe442, Gln449 or Leu456 in RIP3 to Ala, or triple alanine mutations of Ser454/Leu456/Val455  
 751 in RIPK3 crippled the TNF-induced cell necroptosis. The NIH-3T3 cells with indicated lentivirus infection were treated T/S/Z  
 752 for 10 hr. The number of surviving cells was analyzed by measuring ATP levels (left). The data are represented as the mean  $\pm$   
 753 SD of duplicate wells. The mouse RIPK3 expression level was measured by western blot analysis (right).

754

755

756

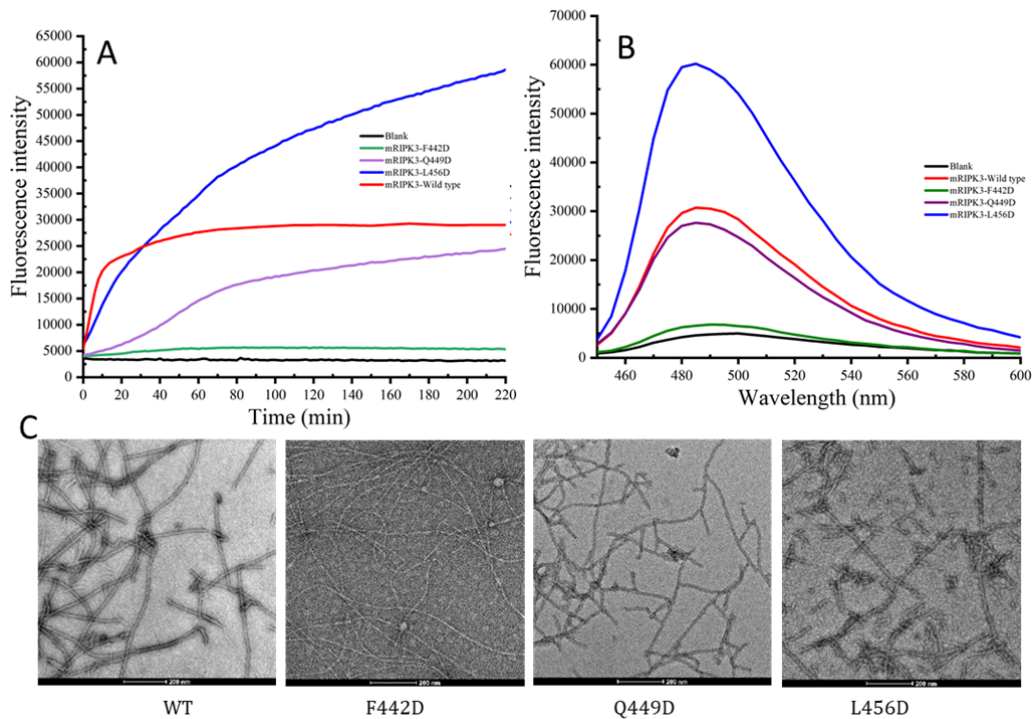

757

758 Figure S7 Characterization of wild type and mutant mouse RIPK3 fibrils using fluorescence and TEM (A) Fluorescence  
 759 intensity increases during the fibril growth. (B) The fluorescence profile of mouse RIPK3 wild-type and mutant fibrils. (C) TEM  
 760 images of mouse RIPK3 wild-type and mutant fibrils.



|      |       |  |      |      |      |  |      |  |  |  |  |
|------|-------|--|------|------|------|--|------|--|--|--|--|
| R461 | 111.8 |  | 57.3 | 31.7 | 27.1 |  | 43.2 |  |  |  |  |
|------|-------|--|------|------|------|--|------|--|--|--|--|

770

771 Table S2. Structural restraints used in Xplor-NIH calculations.

| Xplor-NIH potential term                                                                            |        |        |              |              |                    |                                                              |                                  |                                  |                                          |                               |                               |  |
|-----------------------------------------------------------------------------------------------------|--------|--------|--------------|--------------|--------------------|--------------------------------------------------------------|----------------------------------|----------------------------------|------------------------------------------|-------------------------------|-------------------------------|--|
| CDIH                                                                                                |        |        |              |              |                    | NOE                                                          |                                  |                                  |                                          |                               |                               |  |
| torsion angles based on prediction by TALOS-N (all errors were expanded as described in the method) |        |        |              |              |                    | parallel cross- $\beta$ sheet (intermolecular alignment) (Å) |                                  |                                  | long-range contacts (residue crosspeaks) |                               |                               |  |
|                                                                                                     |        |        |              |              |                    |                                                              |                                  |                                  | unambi-guuous                            | unambi-guuous                 | Ambiguous (low ambiguity)     |  |
| resid                                                                                               | $\Psi$ | $\Phi$ | $\Delta\Psi$ | $\Delta\Phi$ | $\chi(\Delta\chi)$ | C-C                                                          | H <sub>n</sub> -O <sub>n-1</sub> | N <sub>n</sub> -O <sub>n-1</sub> | TEDOR (4.5±2.5Å)                         | inter-residue DARR (5.5±1.5Å) | residues DARR (5.5±2.5Å)      |  |
| V441                                                                                                |        |        |              |              |                    |                                                              |                                  |                                  | V441N-F44                                | V441Cg#-G                     | V441/V448Cg#-I450/N           |  |
| F442                                                                                                | 129.8  | -106.4 | 35.0         | 35.0         |                    |                                                              |                                  |                                  | 2Ca,                                     | 451Ca,                        | 454Cb,                        |  |
| N443                                                                                                | 135.6  | -73.5  | 41.1         | 66.2         |                    |                                                              |                                  |                                  | F442N-V44                                | S446Cb-V44                    | V441Cg-F442/N443/N            |  |
| N444                                                                                                |        | -115.4 |              | 73.6         |                    | 4.75±0.1                                                     | 2.3±0.1                          | 3.3±0.1                          | 1Cb,<br>F442N-N44                        | 8Cb,<br>I450Cg2-N4            | 452Cb,<br>Q449Cb-I450/N454Cb, |  |
| C445                                                                                                |        |        |              |              |                    |                                                              | 2.3±0.1                          | 3.3±0.1                          | 3Ca,                                     | 52Ca,                         | Q449Cg-I450/N454Cb,           |  |
| S446                                                                                                | 163.9  | -118.4 | 35.0         | 70.2         |                    |                                                              |                                  |                                  | Q449Ne2-V                                | N452Cb-N4                     | Q449Cd-E447/S455Ca,           |  |
| E447                                                                                                | 41.7   | 56.4   | 35.0         | 35.0         |                    |                                                              |                                  |                                  | 448Ca,                                   | 54Ca,                         | I450Cg2-V448/V441Cg           |  |
| V448                                                                                                | 145.1  | -116.4 | 35.8         | 22.3         |                    | 4.75±0.1                                                     |                                  |                                  | S455N-N45                                | N452Ca-N4                     | ,                             |  |
| Q449                                                                                                | 139.6  | -116.2 | 37.0         | 46.8         |                    |                                                              | 2.3±0.1                          | 3.3±0.1                          | 4Cb,                                     | 54Ca,                         | I450Cg2-Q449Cd/N452           |  |
| I450                                                                                                | 124.5  | -114.3 | 35.0         | 35.7         | -58.1 (6.6)        |                                                              |                                  |                                  | S455N-L456                               | Q449Cd-L45                    | Cg, I450Cg2-F442/             |  |
| G451                                                                                                | 168.8  |        | 52.2         |              |                    |                                                              | 2.3±0.1                          | 3.3±0.1                          | C,                                       | 6Cb,                          | N452Cb,                       |  |
| N452                                                                                                | 157.2  | -101.9 | 35.0         | 75.1         |                    |                                                              |                                  |                                  | A457N-L45                                | Q449Cd-L45                    | I450Cg1/P459/P460Cg-          |  |
| Y453                                                                                                | 28.5   | 63.6   | 39.1         | 35.0         | -52.9 (12.3)       |                                                              |                                  |                                  | 6Cg,                                     | 6Cg,                          | F442Cg,                       |  |
| N454                                                                                                |        | -77.2  |              | 36.0         | -69.4 (11.8)       |                                                              |                                  |                                  | A457N-L45                                | Y453Cb-S45                    | G451C-Q449Cg/V457C            |  |
| S455                                                                                                | 128.0  | -115.4 | 53.2         | 55.4         |                    | 4.75±0.05                                                    |                                  |                                  | 6Cd2,                                    | 5Cb                           | b,                            |  |
| L456                                                                                                | 129.6  | -103.3 | 35.0         | 42.5         | 177.9 (8.0)        |                                                              | 2.3±0.1                          | 3.3±0.1                          | N454Nd2-G                                |                               | G451C-Q449/N454Ca,            |  |
| V457                                                                                                | 134.4  |        | 48.4         |              | -177.6 (17.0)      |                                                              |                                  |                                  | 451Ca,                                   |                               | G451C-I450/N454Cb,            |  |
| A458                                                                                                | 146.9  | -68.8  | 47.3         | 45.4         |                    |                                                              |                                  |                                  | Q449Ne2-L                                |                               | N452Ca-I450/N454Cb,           |  |
| P459                                                                                                | 147.4  | -61.4  | 35.0         | 35.0         |                    |                                                              |                                  |                                  | 456Cg                                    |                               | Y453Cg-E447/S455Ca,           |  |
| P460                                                                                                | 151.1  | -64.4  | 35.0         | 35.0         |                    |                                                              |                                  |                                  |                                          |                               | S455Cb-Q449Cg/V457            |  |
| R461                                                                                                |        |        |              |              |                    |                                                              |                                  |                                  |                                          |                               | Cb,                           |  |
|                                                                                                     |        |        |              |              |                    |                                                              |                                  |                                  |                                          |                               | S455Cb-V448/V457Cg,           |  |
|                                                                                                     |        |        |              |              |                    |                                                              |                                  |                                  |                                          |                               | S455Cb-I450/Y453Ca,           |  |
|                                                                                                     |        |        |              |              |                    |                                                              |                                  |                                  |                                          |                               | S446/S455-V448/V457           |  |
|                                                                                                     |        |        |              |              |                    |                                                              |                                  |                                  |                                          |                               | Cg,                           |  |
|                                                                                                     |        |        |              |              |                    |                                                              |                                  |                                  |                                          |                               | L456Ca-I450/N454Cb,           |  |
|                                                                                                     |        |        |              |              |                    |                                                              |                                  |                                  |                                          |                               | L456Cg-Q449Cg/V457            |  |
|                                                                                                     |        |        |              |              |                    |                                                              |                                  |                                  |                                          |                               | Cb                            |  |
|                                                                                                     |        |        |              |              |                    |                                                              |                                  |                                  |                                          |                               | L456Cd2-Q449/N454Ca           |  |
|                                                                                                     |        |        |              |              |                    |                                                              |                                  |                                  |                                          |                               | ,                             |  |
|                                                                                                     |        |        |              |              |                    |                                                              |                                  |                                  |                                          |                               | L456Cd2-Q449/I450Cb,          |  |

772

773

774

775 Table S3. Structure statistics for mouse RIPK3

| constraints                                  | number                    |
|----------------------------------------------|---------------------------|
| dihedral angles                              | 32                        |
| chi angles                                   | 5                         |
| unambiguous intramolecular residues contacts | 97<br>(10 non-sequential) |
| ambiguous intramolecular residues contacts   | 22                        |
| intermolecular constraints                   | parallel beta-sheet       |
| MolProbity Clashscore                        | 6                         |
| MolProbity Ramachandran outliers             | 0                         |
| MolProbity sidechain conformer outliers      | 2.1%                      |
| backbone RMSD(Å)                             | 0.28                      |

776

777

778

779 **Uncategorized References**

- 780 1 Otzen, D. & Riek, R. Functional Amyloids. *Cold Spring Harb Perspect Biol* **11**,  
781 doi:10.1101/cshperspect.a033860 (2019).
- 782 2 Wu, H. & Fuxreiter, M. The Structure and Dynamics of Higher-Order Assemblies: Amyloids, Signalosomes,  
783 and Granules. *Cell* **165**, 1055-1066, doi:10.1016/j.cell.2016.05.004 (2016).
- 784 3 Li, J. *et al.* The RIP1/RIP3 necrosome forms a functional amyloid signaling complex required for  
785 programmed necrosis. *Cell* **150**, 339-350, doi:10.1016/j.cell.2012.06.019 (2012).
- 786 4 He, S. *et al.* Receptor interacting protein kinase-3 determines cellular necrotic response to TNF-alpha. *Cell*  
787 **137**, 1100-1111, doi:10.1016/j.cell.2009.05.021 (2009).
- 788 5 Sun, L. *et al.* Mixed lineage kinase domain-like protein mediates necrosis signaling downstream of RIP3  
789 kinase. *Cell* **148**, 213-227, doi:10.1016/j.cell.2011.11.031 (2012).
- 790 6 Rodriguez, D. A. *et al.* Characterization of RIPK3-mediated phosphorylation of the activation loop of MLKL  
791 during necroptosis. *Cell Death Differ* **23**, 76-88, doi:10.1038/cdd.2015.70 (2016).
- 792 7 Wang, H. *et al.* Mixed lineage kinase domain-like protein MLKL causes necrotic membrane disruption upon  
793 phosphorylation by RIP3. *Mol Cell* **54**, 133-146, doi:10.1016/j.molcel.2014.03.003 (2014).
- 794 8 Dondelinger, Y. *et al.* MLKL compromises plasma membrane integrity by binding to phosphatidylinositol  
795 phosphates. *Cell Rep* **7**, 971-981, doi:10.1016/j.celrep.2014.04.026 (2014).
- 796 9 Degterev, A. *et al.* Identification of RIP1 kinase as a specific cellular target of necrostatins. *Nat Chem Biol* **4**,  
797 313-321, doi:10.1038/nchembio.83 (2008).
- 798 10 Kaiser, W. J. *et al.* Toll-like receptor 3-mediated necrosis via TRIF, RIP3, and MLKL. *J Biol Chem* **288**,  
799 31268-31279, doi:10.1074/jbc.M113.462341 (2013).
- 800 11 Ingram, J. P. *et al.* ZBP1/DAI Drives RIPK3-Mediated Cell Death Induced by IFNs in the Absence of RIPK1.

- 801 *J Immunol* **203**, 1348-1355, doi:10.4049/jimmunol.1900216 (2019).
- 802 12 Mompean, M. *et al.* The Structure of the Necrosome RIPK1-RIPK3 Core, a Human Hetero-Amyloid  
803 Signaling Complex. *Cell* **173**, 1244-1253 e1210, doi:10.1016/j.cell.2018.03.032 (2018).
- 804 13 Wu, X. N. *et al.* Distinct roles of RIP1-RIP3 hetero- and RIP3-RIP3 homo-interaction in mediating  
805 necroptosis. *Cell Death Differ* **21**, 1709-1720, doi:10.1038/cdd.2014.77 (2014).
- 806 14 Beerten, J. *et al.* WALTZ-DB: a benchmark database of amyloidogenic hexapeptides. *Bioinformatics* **31**,  
807 1698-1700, doi:10.1093/bioinformatics/btv027 (2015).
- 808 15 Buchan, D. W., Minneci, F., Nugent, T. C., Bryson, K. & Jones, D. T. Scalable web services for the PSIPRED  
809 Protein Analysis Workbench. *Nucleic Acids Res* **41**, W349-357, doi:10.1093/nar/gkt381 (2013).
- 810 16 Buchan, D. W. A. & Jones, D. T. The PSIPRED Protein Analysis Workbench: 20 years on. *Nucleic Acids Res*  
811 **47**, W402-W407, doi:10.1093/nar/gkz297 (2019).
- 812 17 Chen, B., Thurber, K. R., Shewmaker, F., Wickner, R. B. & Tycko, R. Measurement of amyloid fibril  
813 mass-per-length by tilted-beam transmission electron microscopy. *Proc Natl Acad Sci U S A* **106**,  
814 14339-14344, doi:10.1073/pnas.0907821106 (2009).
- 815 18 Murray, D. T. *et al.* Structure of FUS Protein Fibrils and Its Relevance to Self-Assembly and Phase  
816 Separation of Low-Complexity Domains. *Cell* **171**, 615-627 e616, doi:10.1016/j.cell.2017.08.048 (2017).
- 817 19 Shen, Y. & Bax, A. Protein backbone and sidechain torsion angles predicted from NMR chemical shifts using  
818 artificial neural networks. *Journal of Biomolecular NMR* **56**, 227-241, doi:10.1007/s10858-013-9741-y  
819 (2013).
- 820 20 Kajava, A. V., Baxa, U. & Steven, A. C. Beta arcades: recurring motifs in naturally occurring and  
821 disease-related amyloid fibrils. *FASEB J* **24**, 1311-1319, doi:10.1096/fj.09-145979 (2010).
- 822 21 Humphrey, W., Dalke, A. & Schulten, K. VMD: visual molecular dynamics. *J Mol Graph* **14**, 33-38, 27-38,  
823 doi:10.1016/0263-7855(96)00018-5 (1996).
- 824 22 Wasmer, C. *et al.* Amyloid fibrils of the HET-s(218-289) prion form a beta solenoid with a triangular  
825 hydrophobic core. *Science* **319**, 1523-1526, doi:10.1126/science.1151839 (2008).
- 826 23 Wickner, R. B. & Edskes, H. K. Yeast killer elements hold their hosts hostage. *PLoS Genet* **11**, e1005139,  
827 doi:10.1371/journal.pgen.1005139 (2015).
- 828 24 Daskalov, A. *et al.* Identification of a novel cell death-inducing domain reveals that fungal amyloid-controlled  
829 programmed cell death is related to necroptosis. *Proceedings of the National Academy of Sciences of the*  
830 *United States of America* **113**, 2720-2725, doi:10.1073/pnas.1522361113 (2016).
- 831 25 Loquet, A. & Saupe, S. J. Diversity of Amyloid Motifs in NLR Signaling in Fungi. *Biomolecules* **7**,  
832 doi:10.3390/biom7020038 (2017).
- 833 26 Meng, H. *et al.* Death-domain dimerization-mediated activation of RIPK1 controls necroptosis and  
834 RIPK1-dependent apoptosis. *Proc Natl Acad Sci U S A* **115**, E2001-E2009, doi:10.1073/pnas.1722013115  
835 (2018).
- 836 27 He, S., Liang, Y., Shao, F. & Wang, X. Toll-like receptors activate programmed necrosis in macrophages  
837 through a receptor-interacting kinase-3-mediated pathway. *Proc Natl Acad Sci U S A* **108**, 20054-20059,  
838 doi:10.1073/pnas.1116302108 (2011).
- 839 28 Kneller, T. D. G. a. D. G. SPARKY 3. *University of California, San Francisco*.
- 840 29 Fung, B. M., Khitrin, A. K. & Ermolaev, K. An improved broadband decoupling sequence for liquid crystals  
841 and solids. *J Magn Reson* **142**, 97-101, doi:10.1006/jmre.1999.1896 (2000).
- 842 30 Baldus, M., Petkova, A. T., Herzfeld, J. & Griffin, R. G. Cross polarization in the tilted frame: assignment and  
843 spectral simplification in heteronuclear spin systems. *Mol Phys* **95**, 1197-1207, doi:Doi  
844 10.1080/002689798166215 (1998).

- 845 31 Ernst, M. Heteronuclear spin decoupling in solid-state NMR under magic-angle sample spinning. *J Magn*  
846 *Reson* **162**, 1-34, doi:10.1016/s1090-7807(03)00074-0 (2003).
- 847 32 Jaroniec, C. P., Filip, C. & Griffin, R. G. 3D TEDOR NMR experiments for the simultaneous measurement of  
848 multiple carbon-nitrogen distances in uniformly  $(^{13}\text{C},^{15}\text{N})$ -labeled solids. *J Am Chem Soc* **124**,  
849 10728-10742, doi:10.1021/ja026385y (2002).
- 850 33 Andronesi, O. C. *et al.* Determination of membrane protein structure and dynamics by magic-angle-spinning  
851 solid-state NMR spectroscopy. *J Am Chem Soc* **127**, 12965-12974, doi:10.1021/ja0530164 (2005).
- 852 34 Baldus, M., Iulucci, R. J. & Meier, B. H. Probing Through-Bond Connectivities and Through-Space  
853 Distances in Solids by Magic-Angle-Spinning Nuclear Magnetic Resonance. *J Am Chem Soc* **119**,  
854 1121-1124 (1997).
- 855 35 Baldus, M. & Meier, B. H. Total Correlation Spectroscopy in the Solid State. The Use of Scalar Couplings to  
856 Determine the Through-Bond Connectivity. *J Magn Reson* **121**, 65-69 (1996).
- 857 36 Schwieters, C. D., Kuszewski, J. J., Tjandra, N. & Clore, G. M. The Xplor-NIH NMR molecular structure  
858 determination package. *J Magn Reson* **160**, 65-73, doi:10.1016/s1090-7807(02)00014-9 (2003).
- 859 37 Schwieters, C. D., Bermejo, G. A. & Clore, G. M. Xplor-NIH for molecular structure determination from NMR  
860 and other data sources. *Protein Sci* **27**, 26-40, doi:10.1002/pro.3248 (2018).
- 861 38 Shen, Y., Delaglio, F., Cornilescu, G. & Bax, A. TALOS+: a hybrid method for predicting protein backbone  
862 torsion angles from NMR chemical shifts. *J Biomol NMR* **44**, 213-223, doi:10.1007/s10858-009-9333-z  
863 (2009).
- 864 39 Bermejo, G. A., Clore, G. M. & Schwieters, C. D. Smooth statistical torsion angle potential derived from a  
865 large conformational database via adaptive kernel density estimation improves the quality of NMR protein  
866 structures. *Protein Sci* **21**, 1824-1836, doi:10.1002/pro.2163 (2012).
- 867 40 Ryabov, Y., Suh, J. Y., Grishaev, A., Clore, G. M. & Schwieters, C. D. Using the experimentally determined  
868 components of the overall rotational diffusion tensor to restrain molecular shape and size in NMR structure  
869 determination of globular proteins and protein-protein complexes. *J Am Chem Soc* **131**, 9522-9531,  
870 doi:10.1021/ja902336c (2009).
- 871 41 Tian, Y., Schwieters, C. D., Opella, S. J. & Marassi, F. M. High quality NMR structures: a new force field with  
872 implicit water and membrane solvation for Xplor-NIH. *J Biomol NMR* **67**, 35-49,  
873 doi:10.1007/s10858-016-0082-5 (2017).
- 874 42 Montelione, G. T. *et al.* Recommendations of the wwPDB NMR Validation Task Force. *Structure* **21**,  
875 1563-1570, doi:10.1016/j.str.2013.07.021 (2013).
- 876 43 Schwieters, C. D., Bermejo, G. A. & Clore, G. M. A three-dimensional potential of mean force to improve  
877 backbone and sidechain hydrogen bond geometry in Xplor-NIH protein structure determination. *Protein Sci*  
878 **29**, 100-110, doi:10.1002/pro.3745 (2020).
- 879
